# Supplementary material
Source: PubMed Central journal article supplement (PMC9900333)
Supplement: EMBR-24-e55778-s001.pdf [file EMBR-24-e55778-s001.pdf]

## Appendix

### **M1AP interacts with the mammalian ZZS complex and promotes male meiotic recombination**

Yang Li<sup>1\*</sup>, Yufan Wu<sup>1\*</sup>, Ihsan Khan<sup>1\*</sup>, Jianteng Zhou<sup>1</sup>, Yue Lu<sup>1</sup>, Jingwei Ye<sup>1</sup>,  
Junyan Liu<sup>1</sup>, Xuefeng Xie<sup>1</sup>, Congyuan Hu<sup>1</sup>, Hanwei Jiang<sup>1</sup>, Suixing Fan<sup>1</sup>,  
Huan Zhang<sup>1</sup>, Yuanwei Zhang<sup>1</sup>, Xiaohua Jiang<sup>1</sup>, Bo Xu<sup>1</sup>, Hui Ma<sup>1#</sup>, Qinghua  
Shi<sup>1#</sup>

### **Table of content**

|                    |       |       |
|--------------------|-------|-------|
| Appendix Figure S1 | ..... | page2 |
| Appendix Figure S2 | ..... | page3 |
| Appendix Figure S3 | ..... | page4 |

# Appendix Figure S1

A

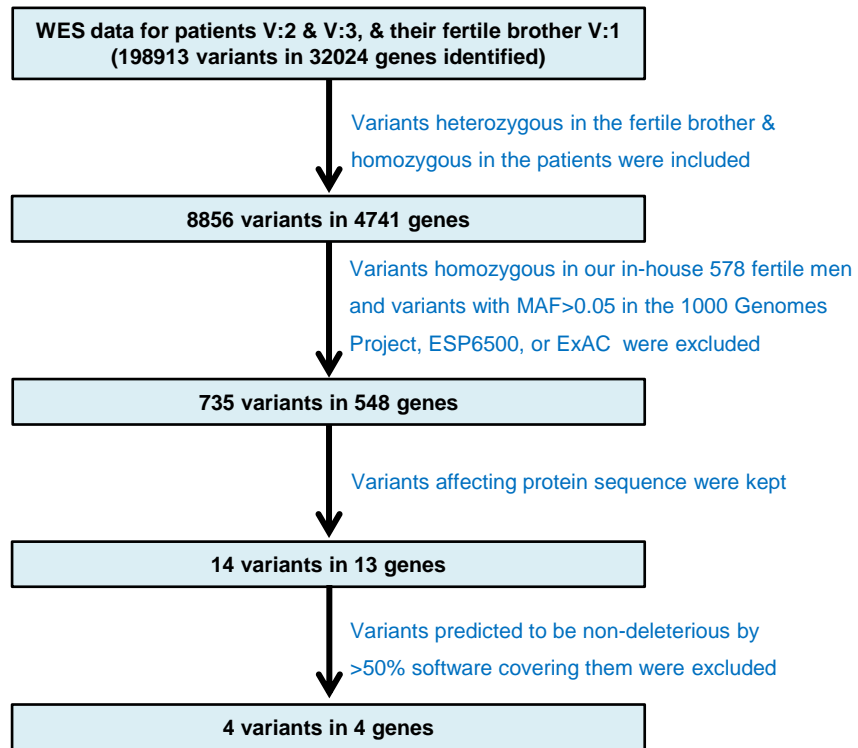

B

| Human gene symbol | Mouse gene symbol | Mutation type              | cDNA change           | Predicted protein change | Remark                                                                                                   |
|-------------------|-------------------|----------------------------|-----------------------|--------------------------|----------------------------------------------------------------------------------------------------------|
| <i>MIAP</i>       | <i>Mlap</i>       | splicing                   | 1074+2T>C             | Not applicable           | Mice homozygous for a hypomorphic allele exhibit severe oligozoospermia and infertility (PMID:23269666). |
| <i>MCEE</i>       | <i>Mcee</i>       | missense                   | G428A                 | R143H                    | No mention of reproductive phenotype after knockout of this gene in MGI (MGI:1920974).                   |
| <i>DYSF</i>       | <i>Dysf</i>       | nonframeshift substitution | 3181delinsC<br>AGGCGG | 1062insAE                | No mention of reproductive phenotype after knockout of this gene in MGI (MGI:1349385).                   |
| <i>AHCTF1P1</i>   | -                 | missense                   | G1381A                | E461K                    | This gene is a pseudogene.                                                                               |

## Appendix Figure S1. Whole-exome sequencing data analysis for the consanguineous Pakistani family

A. Whole-exome sequencing (WES) data analysis pipeline. MAF, minor allele frequency.

B. Information on the variants identified following bioinformatic analysis of WES data. MGI, mouse genome informatics.

## Appendix Figure S2

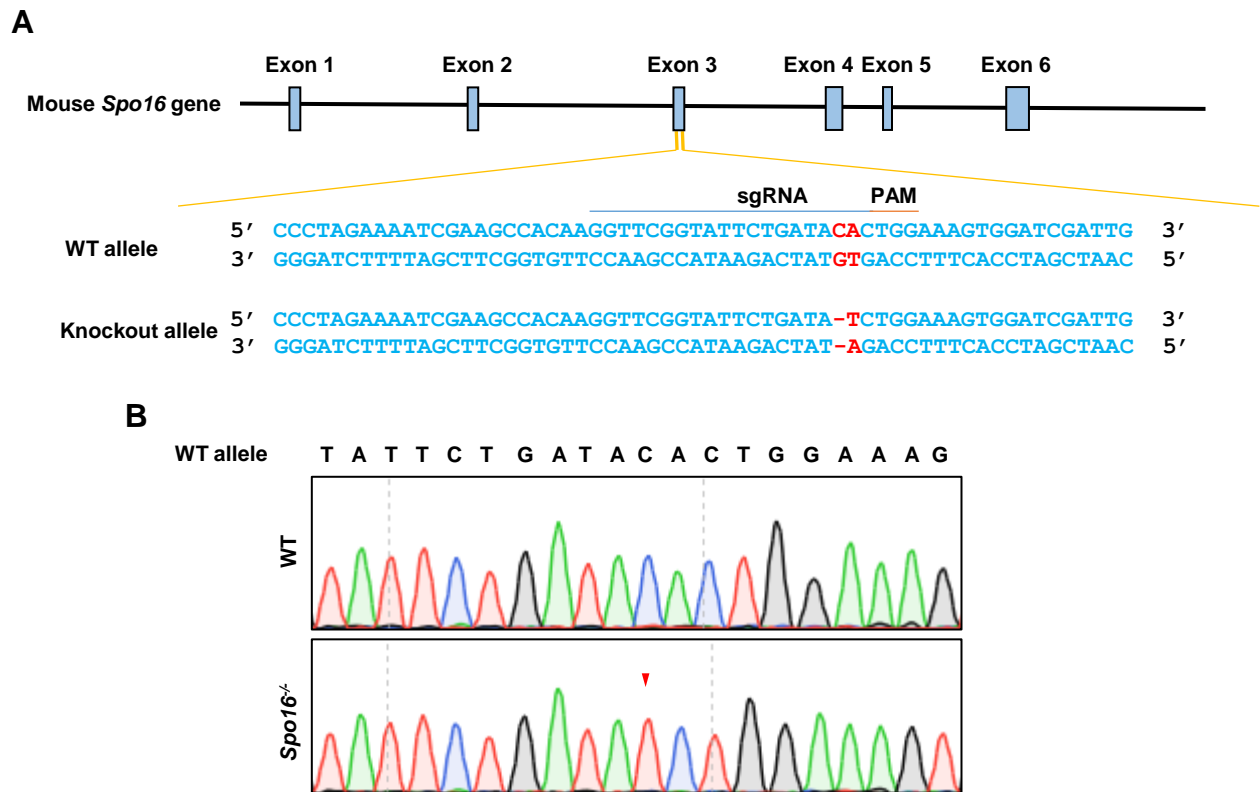

### Appendix Figure S2. Generation of *Spo16*<sup>-/-</sup> mice

- A. The strategy to generate *Spo16*<sup>-/-</sup> mice. The single guide RNA (underlined) was designed to target exon 3 of the *Spo16* gene. The mutation site is written in red, where “CA” is replaced by “T”. WT, wild-type. PAM, protospacer adjacent motif.
- B. Sanger sequencing confirmed the mutation in the *Spo16*<sup>-/-</sup> mice at the genomic DNA level. The arrowhead indicates the mutation site.

## Appendix Figure S3

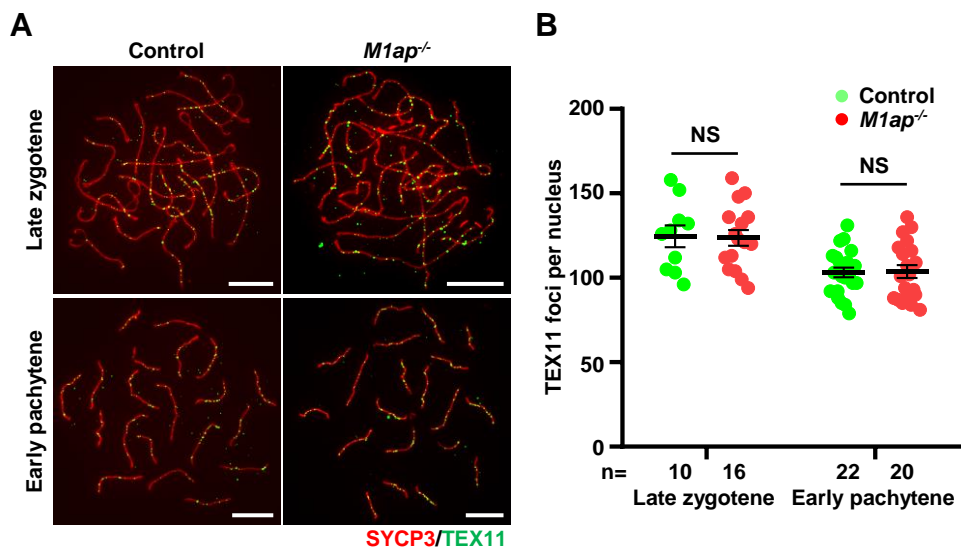

**Appendix Figure S3. No obvious differences were observed in the number of TEX11 foci between control and *M1ap*<sup>-/-</sup> oocytes**

A. Immunofluorescence staining with antibodies against SYCP3 (red) and TEX11 (green) on oocyte spreads from 16.5 days postcoitus (dpc) control and *M1ap*<sup>-/-</sup> fetal mice. Scale bars, 10  $\mu\text{m}$ .

B. The mean number of TEX11 foci per cell in control and *M1ap*<sup>-/-</sup> oocytes at the indicated stages. Data are presented as mean  $\pm$  SEM. n shows the number of cells examined for at least two mice per genotype. NS, not significant; two-tailed Student's *t*-test.
