# Supplementary material
Source: PubMed Central journal article supplement (PMC9900333)
Supplement: EMBR-24-e55778-s007.pdf [file EMBR-24-e55778-s007.pdf]

# M1AP interacts with the mammalian ZZS complex and promotes male meiotic recombination

Yang Li<sup>†</sup> , Yufan Wu<sup>†</sup>, Ihsan Khan<sup>†</sup> , Jianteng Zhou, Yue Lu, Jingwei Ye, Junyan Liu, Xuefeng Xie, Congyuan Hu, Hanwei Jiang, Suixing Fan , Huan Zhang, Yuanwei Zhang , Xiaohua Jiang, Bo Xu, Hui Ma <sup>\*</sup>  & Qinghua Shi <sup>\*\*</sup> 

## Abstract

Following meiotic recombination, each pair of homologous chromosomes acquires at least one crossover, which ensures accurate chromosome segregation and allows reciprocal exchange of genetic information. Recombination failure often leads to meiotic arrest, impairing fertility, but the molecular basis of recombination remains elusive. Here, we report a homozygous *M1AP* splicing mutation (c.1074 + 2T > C) in patients with severe oligozoospermia owing to meiotic metaphase I arrest. The mutation abolishes M1AP foci on the chromosome axes, resulting in decreased recombination intermediates and crossovers in male mouse models. M1AP interacts with the mammalian ZZS (an acronym for yeast proteins Zip2-Zip4-Spo16) complex components, SHOC1, TEX11, and SPO16. M1AP localizes to chromosomal axes in a SPO16-dependent manner and colocalizes with TEX11. Ablation of M1AP does not alter SHOC1 localization but reduces the recruitment of TEX11 to recombination intermediates. M1AP shows cytoplasmic localization in fetal oocytes and is dispensable for fertility and crossover formation in female mice. Our study provides the first evidence that M1AP acts as a copartner of the ZZS complex to promote crossover formation and meiotic progression in males.

**Keywords** crossover; M1AP; meiotic recombination; severe oligospermia; ZZS complex

**Subject Categories** Cell Cycle; DNA Replication, Recombination & Repair; Molecular Biology of Disease

**DOI** 10.15252/embr.202255778 | Received 12 July 2022 | Revised 4 November 2022 | Accepted 8 November 2022 | Published online 28 November 2022

**EMBO Reports (2023) 24: e55778**

## Introduction

Meiosis is a specialized cell division of sexual reproductive organisms, during which germ cells undergo a single round of DNA replication followed by two consecutive cell divisions to produce haploid gametes.

Meiotic recombination plays a central role in this process. It occurs preferentially between nonsister chromatids of homologous chromosomes and permits the reciprocal exchange of genetic materials, assuring faithful segregation of chromosomes and creating genetic diversity in gametes (Baudat *et al*, 2013; Hunter, 2015; Zickler & Kleckner, 2015). Meiotic recombination is initiated by the formation of programmed DNA double-strand breaks (DSBs) catalyzed by SPO11 and TOPOVIBL (Baudat *et al*, 2000; Romanienko & Camerini-Otero, 2000; Robert *et al*, 2016; Vrielynck *et al*, 2016). DSBs are rapidly resected to form 3' single-stranded DNA (ssDNA) overhangs, which are coated with ssDNA-binding proteins, replication protein A (RPA) complexes. Recombinases RAD51/DMC1 soon replace RPA and direct strand invasion into homologous chromosomes, leading to the formation of early recombination intermediates that are further processed to yield single-end invasion (SEI) intermediates (Brown & Bishop, 2014). The intermediates that are designated for crossover formation are stabilized by a set of conserved proteins, known as “ZMM” proteins (an acronym for yeast proteins Zip1/Zip2/Zip3/Zip4, Msh4/Msh5, Mer3 and Spo16; Sym *et al*, 1993; Hollingsworth *et al*, 1995; Chua & Roeder, 1998; Nakagawa & Ogawa, 1999; Agarwal & Roeder, 2000; Novak *et al*, 2001; Börner *et al*, 2004; Snowden *et al*, 2004; Tsubouchi *et al*, 2006; Shinohara *et al*, 2008; Pyatnitskaya *et al*, 2019). Following the capture of the second DSB ends, double Holliday junctions (dHJs) are produced and subsequently resolved into crossovers catalyzed by endonuclease MLH1/3 (Baker *et al*, 1996; Edlmann *et al*, 1996; Wang *et al*, 1999; Lipkin *et al*, 2002; Nishant *et al*, 2008; Zakharyevich *et al*, 2012). Crossover formation is tightly regulated, such that only approximately 10% of DSBs finally become crossovers, and each homologous chromosome pair acquires at least one crossover (Baudat *et al*, 2013). Failures in meiotic recombination often cause meiotic arrest and infertility (Handel & Schimenti, 2010).

Three ZMM proteins, ZIP2, ZIP4, and SPO16, form a functionally conserved protein complex known as “ZZS,” which was initially described in budding yeast (*Saccharomyces cerevisiae*; Chua & Roeder, 1998; Tsubouchi *et al*, 2006; Adelman & Petrini, 2008; Macaisne *et al*, 2008; Shinohara *et al*, 2008; Yang *et al*, 2008b; De

Division of Reproduction and Genetics, First Affiliated Hospital of USTC, Hefei National Research Center for Physical Sciences at the Microscale, The CAS Key Laboratory of Innate Immunity and Chronic Disease, School of Basic Medical Sciences, Division of Life Sciences and Medicine, Biomedical Sciences and Health Laboratory of Anhui Province, University of Science and Technology of China, Hefei, China

\*Corresponding author. Tel: +86 0551 63600442; E-mail: clsmh@ustc.edu.cn

\*\*Corresponding author. Tel: +86 0551 63600344; E-mail: qshi@ustc.edu.cn

<sup>†</sup>These authors contributed equally to this work

Muyt *et al*, 2018; Guiraldelli *et al*, 2018; Zhang *et al*, 2018, 2019b). During yeast meiosis, the ZZS complex localizes to early recombination intermediates shortly after strand invasion and stabilizes these early recombination intermediates to facilitate the formation of SEIs and subsequent crossovers (De Muyt *et al*, 2018; Arora & Corbett, 2019). The mammalian homologs of Zip2, Zip4, and Spo16 have been characterized as SHOC1, TEX11, and SPO16, respectively. In mice, all three ZZS proteins localize to chromosome axes as discrete foci and have similar foci kinetics in meiotic prophase I (Yang *et al*, 2008b; Guiraldelli *et al*, 2018; Zhang *et al*, 2018, 2019b; Liu *et al*, 2019). SHOC1 binds to early recombination intermediates after strand invasion (Zhang *et al*, 2018); SPO16 is then recruited by SHOC1 to stabilize its localization on the intermediates and further recruits TEX11 to facilitate the repair of DSBs through the dHJ pathway (Zhang *et al*, 2019b). *Shoc1*<sup>-/-</sup> and *Spo16*<sup>-/-</sup> mice showed severe defects in synapsis and meiotic arrest at a zygotene-like or an early pachytene-like stage without crossover formation (Zhang *et al*, 2018, 2019b), while knockout of *Tex11* in mice caused a milder defect in synapsis and reduced crossover formation, leading to meiotic metaphase I (MMI) arrest (Adelman & Petrini, 2008; Yang *et al*, 2008b). However, how the ZZS complex regulates the processing of recombination intermediates is not fully understood in mice.

M1AP (meiosis 1 arresting protein) has been reported to be essential for male meiosis in mice, and its mutations have been found frequently in infertile men (Arango *et al*, 2013; Tu *et al*, 2020; Wyrwoll *et al*, 2020), but the molecular role of M1AP remains uncharacterized. In this study, we identified a homozygous *M1AP* splicing mutation (c.1074 + 2T > C) in a consanguineous Pakistani family with two cases of severe oligozoospermia owing to MMI arrest. Using mice carrying a splicing mutation equivalent to that of our patients, we showed that the mutation leads to abolished M1AP foci and reduced crossovers, resulting in MMI arrest. M1AP interacts with the ZZS complex and promotes the recruitment of TEX11 at the recombination intermediates. Our study demonstrates *M1AP* as a pathogenic gene for human male infertility using mouse models and unveils the molecular role of M1AP as a ZZS partner in male meiotic recombination.

## Results

### A homozygous *M1AP* splicing mutation was identified in patients with severe oligozoospermia and MMI arrest

We recruited a consanguineous Pakistani family with two brothers (V:2 and V:3) suffering from severe oligozoospermia (Fig 1A and Table EV1). According to the World Health Organization (WHO), the lower reference limit for sperm concentration is  $15 \times 10^6$  spermatozoa per ml (WHO, 2010), but the mean sperm concentration for patient V:2 and V:3 was  $0.8 \pm 0.5$  and  $0.3 \pm 0.3$  million/ml, respectively (Table EV1). For patient V:3, no sperm were found in the last two semen analyses, so testicular biopsy was conducted. H&E staining of testicular sections revealed the presence of spermatogonia and spermatocytes in the seminiferous tubules of patient V:3, but we could hardly find spermatids or spermatozoa (Fig 1B). Noticeably, many meiotic metaphase cells with unaligned chromosomes were observed and confirmed by the staining of anti-Histone H3 (phospho S10) in tubules of the patient (Fig 1B and C). These results indicate MMI arrest in the testis of our patient.

To explore the genetic cause of severe oligozoospermia in this family, whole-exome sequencing (WES) was performed with genomic DNA from the patients and their fertile brother (V:1). Considering that the patients were born to consanguineous parents, variants following autosomal recessive inheritance were given priority. Taking the spermatogenic defects of our patients into account, we identified a homozygous splicing site mutation in *M1AP* (NM\_001321739.2), c.1074 + 2T > C, as the candidate variant most likely pathogenic for the infertility of the two patients after variant filtration with a series of criteria (Appendix Fig S1A and B). Sanger sequencing of genomic DNA extracted from blood samples validated that the mutation is homozygous in both patients and heterozygous in the fertile brother (Fig 1D).

The *M1AP* mutation is located in the region of the splice donor site at the boundary between exon 7 and intron 7–8. To assess the impact of the mutation on *M1AP* splicing, minigene vectors containing the genomic sequence spanning intron 5–6 and intron 8–9 of the *M1AP* gene were transfected into HEK-293T cells, followed by reverse transcription-PCR (RT-PCR). The wild-type *M1AP* minigene showed a canonical splicing pattern, producing a band corresponding to the junction of exons 6, 7, and 8, while the splicing mutation (c.1074 + 2T > C) in *M1AP* resulted in a band smaller than that of wild-type (Fig 1E). Sanger sequencing showed that the splicing mutation caused exon 7 skipping, which is predicted to cause premature protein truncation (p. A312Kfs\*7; Fig 1E and F). This result suggests that the splicing mutation in *M1AP* (c.1074 + 2T > C) induces aberrant mRNA splicing.

### M1AP forms discrete foci on chromosome axes in spermatocytes

M1AP has been reported to be essential for male meiosis in mice (Arango *et al*, 2013), but the cellular localization and molecular role of M1AP in meiosis remain uncharacterized. To explore the expression and localization of M1AP, we generated an anti-M1AP antibody that recognizes an epitope consisting of amino acids 415–529 of the mouse protein. M1AP protein was abundant in testes but was not detected in other adult tissues of mice (Fig 2A). M1AP protein was detected in mouse testes from 10 days of postpartum (dpp), when germ cells proceed to spermatocytes (Fig 2B). Immunofluorescence staining of spread spermatocytes revealed that M1AP forms discrete foci localizing on chromosome axes (Fig 2C). M1AP foci were detected from the leptotene stage, accumulated to the maximal level at the late zygotene stage ( $125.65 \pm 4.59$ ), decreased to  $98.36 \pm 1.95$  at the early pachytene stage, and then declined sharply and disappeared in the mid/late pachytene stages (Fig 2D). Notably, most of the M1AP foci localize at synapsed regions. To investigate whether the M1AP foci are dependent on meiotic DSBs, we examined M1AP foci in spermatocytes from *Spo11*<sup>-/-</sup> mice, in which meiotic programmed DSBs were not generated, and found that no M1AP foci were observed (Fig 2C), indicating that the localization of M1AP to the chromosome axes depends on programmed meiotic DSBs. The localization pattern of M1AP suggested a potential role in male meiotic recombination.

### *M1ap*<sup>KI/KI</sup> male mice recapitulate the meiotic defects of our patient

To assess the impacts of the *M1AP* splicing mutation on spermatogenesis, we generated *M1ap* mutant mice (*M1ap*<sup>KI/KI</sup>) carrying the mutation equivalent to that of the patients using CRISPR/Cas9 technology (Fig EV1A).

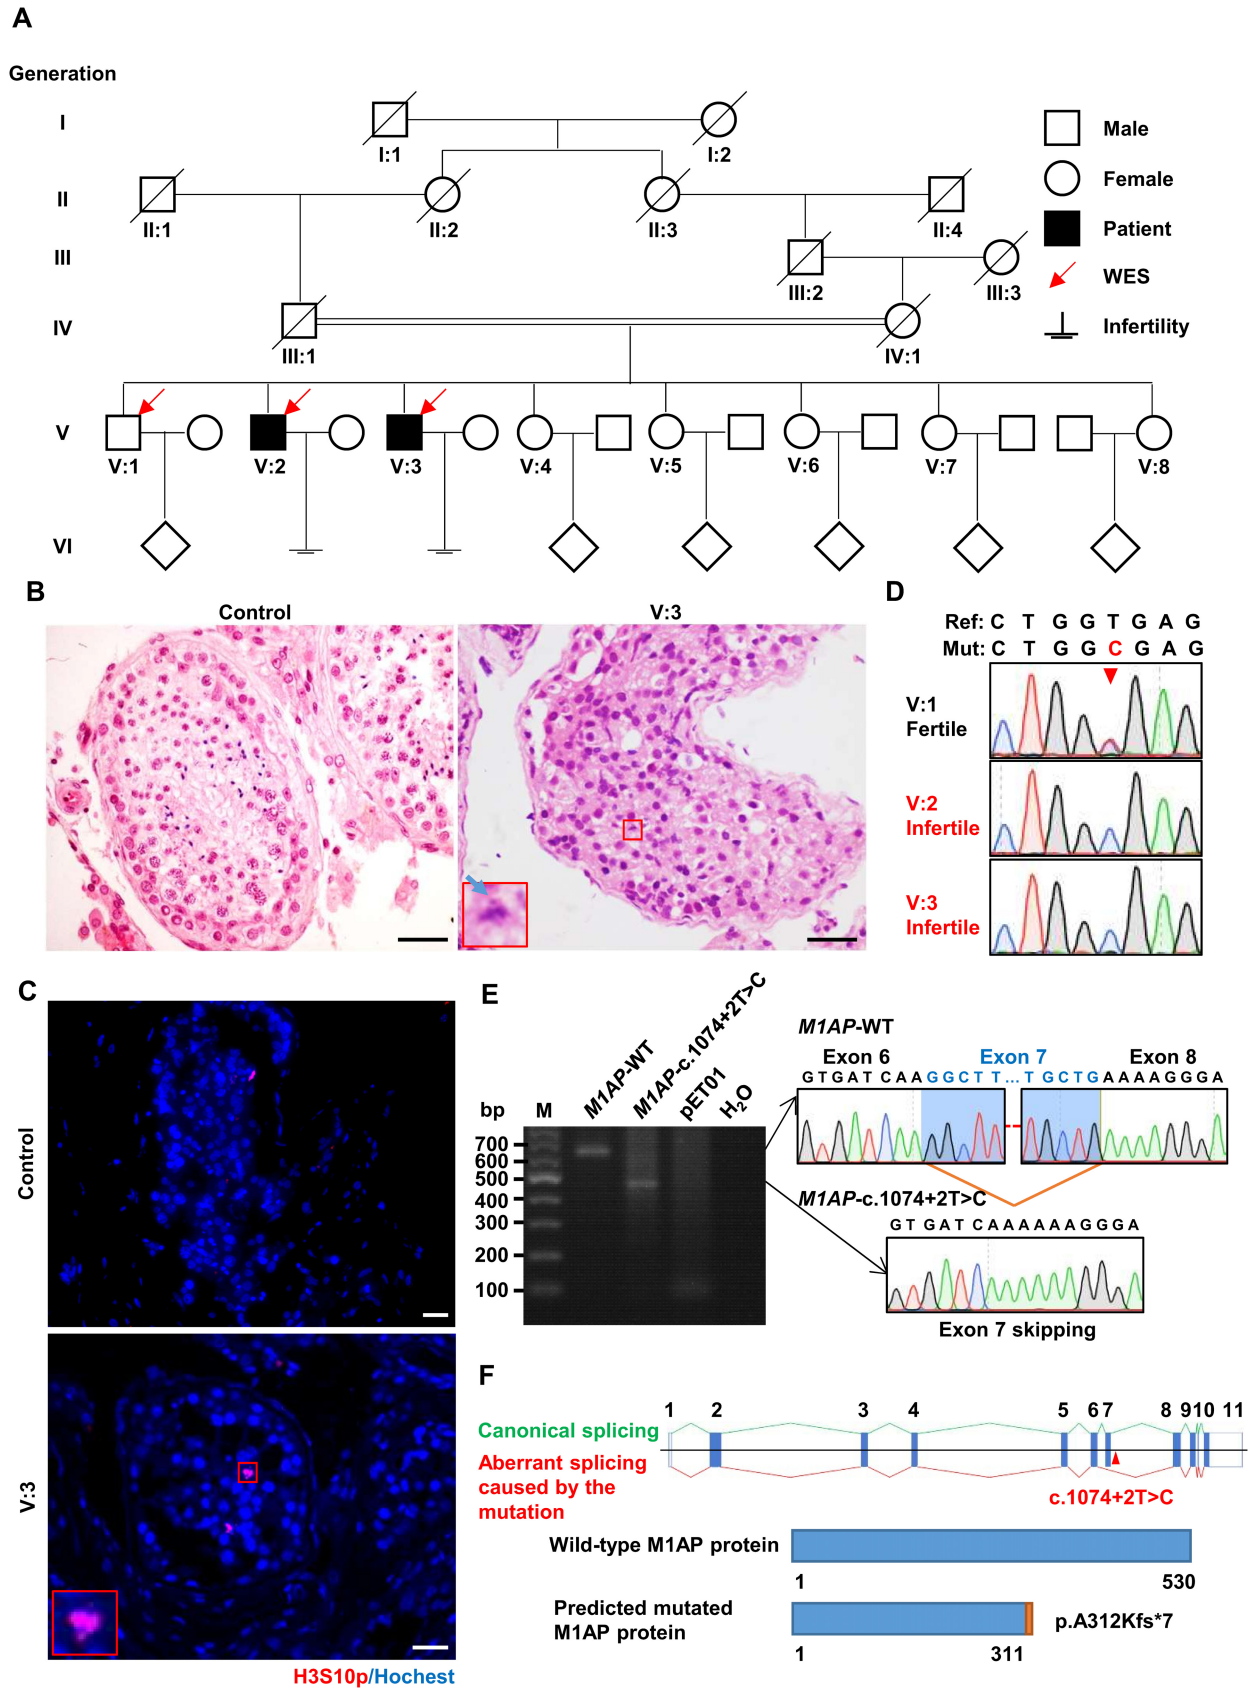

Figure 1.

**Figure 1. Homozygous *M1AP* splicing mutation was identified in a consanguineous Pakistani family with severe oligozoospermia and meiotic metaphase I arrest.**

- A The family pedigree. Arrows represent the individuals for whom whole-exome sequencing was performed. Squares represent males, circles represent females, diamonds indicate offspring, and the slash symbols denote deceased family members. Solid squares indicate male patients suffering from severe oligozoospermia. Double horizontal lines indicate consanguineous marriage.
- B Representative images of hematoxylin and eosin-stained testicular sections from the patient (V:3) and a man diagnosed with obstructive azoospermia, serving as the control. The magnified view of the boxed area is shown in the lower left corner of the image from the patient. The blue arrow indicates unaligned chromosomes in the representative metaphase cells. Scale bars, 50  $\mu$ m.
- C Immunofluorescence staining of testicular sections from control and patient V:3 with antibodies against H3S10p (red), a marker of metaphase cells. The nuclei were stained with Hoechst 33342 (blue). The magnified view of the red box is shown in the lower left corner of the image from the patient. Scale bars, 50  $\mu$ m.
- D Sanger sequencing chromatograms showing the homozygous *M1AP* splicing mutation in patients and heterozygous mutation in their fertile brother. The arrowhead indicates the position of the mutation.
- E Reverse transcription-PCR products of the pET01 empty vector and vectors expressing the wild-type or c.1074 + 2T > C *M1AP* mini gene (containing genomic sequences spanning intron 5–6 and intron 8–9) in HEK-293T cells. The splicing products of wild-type and mutant mini genes were detected by Sanger sequencing. The wild-type transcript is spliced canonically, while the mutant transcript is aberrantly spliced, leading to the skipping of exon 7. M, marker.
- F Schematic representation of the aberrant splicing and the predicted protein truncation caused by the *M1AP* mutation. Vertical solid bars indicate exons of the human *M1AP* gene. The *M1AP* mutation (c.1074 + 2T > C) is located in intron 7–8 near exon 7 (Ensembl transcript ID ENST00000421985.2) and is indicated by the arrowhead. Green lines represent canonical splicing, and red lines represent aberrant splicing caused by the *M1AP* mutation.

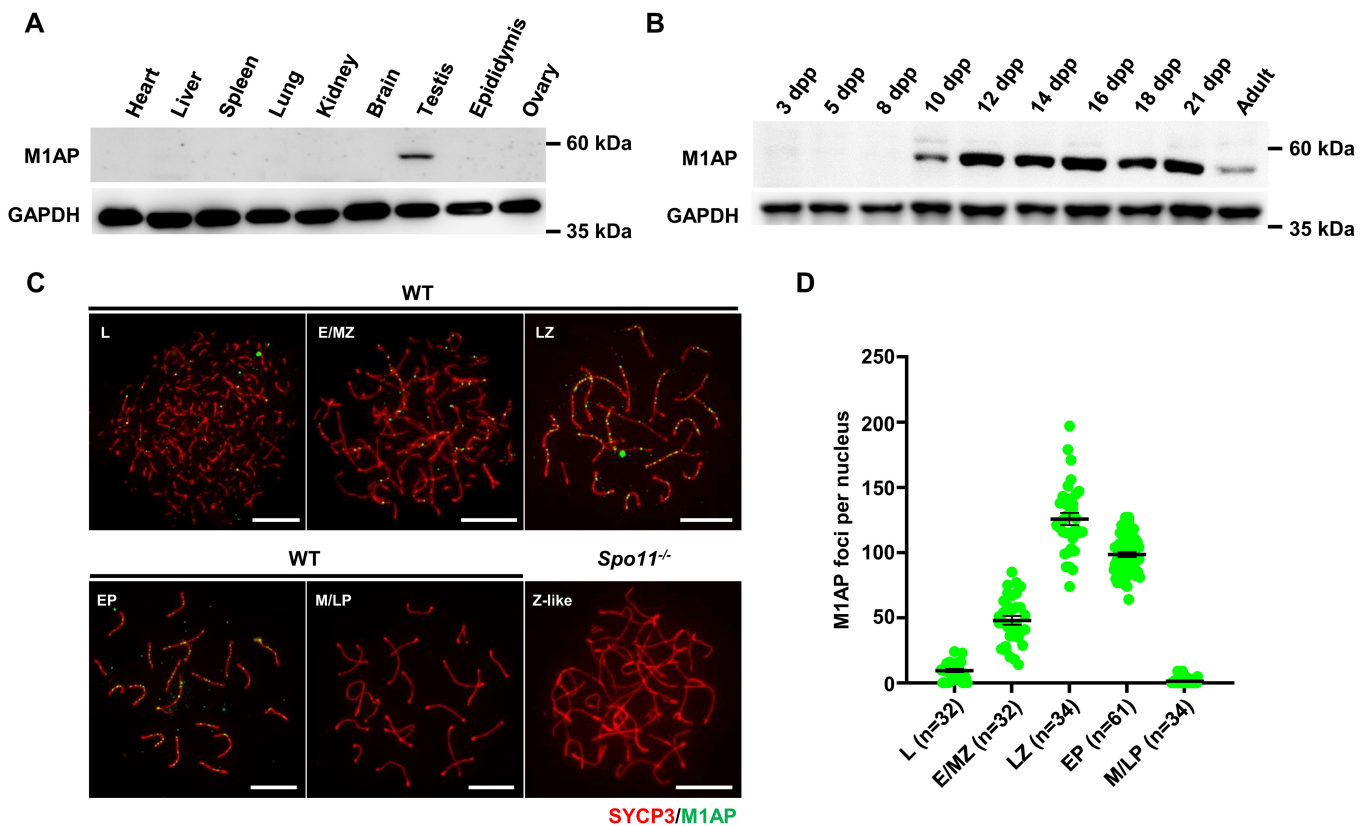

**Figure 2. M1AP forms discrete foci on the chromosome axes in spermatocytes.**

- A Western blot analysis of M1AP expression in various tissues from adult wild-type (WT) mice. GAPDH served as the loading control.
- B Western blot analysis of M1AP expression in testes from mice at different days postpartum (dpp). GAPDH served as the loading control.
- C Immunofluorescence staining of M1AP (green) and SYCP3 (red) on spermatocyte spreads of WT or *Spo11*<sup>-/-</sup> mice. Scale bar, 10  $\mu$ m.
- D Quantification of M1AP foci in WT spermatocytes at the indicated stages. L, leptotene; E/MZ, early/mid zygotene; LZ, late zygotene; EP, early pachytene; M/LP, mid/late pachytene; Z-like, zygotene-like. Data are presented as the mean  $\pm$  SEM. *n* shows the number of spermatocytes analyzed from three biological replicates.

Agarose gel electrophoresis of RT-PCR products with primers flanking exon 6 and exon 8 of *M1ap* cDNA detected one band corresponding to the canonical splicing product in the wild-type testis.

However, two bands, both much fainter than that in wild-type testis, were observed in the *M1ap*<sup>K1/K1</sup> testes (Fig EV1B). Sanger sequencing showed that one band corresponds to the canonical splicing

product, while the other band corresponds to the skipping of exon 7, which is predicted to result in protein truncation (Fig EV1B). Western blotting using the anti-M1AP antibody revealed a very faint band just above the detection level at the size corresponding to the wild-type M1AP proteins in the mutant mice (Fig EV1C). Notably, no M1AP foci were detected on chromosome axes in spread spermatocytes from *M1ap*<sup>KI/KI</sup> mice (Fig EV1D). Thus, in mice, this *M1ap* mutation causes an alteration of mRNA splicing, similar to the observation in patients, and abolished M1AP foci on chromosome axes.

*M1ap*<sup>KI/KI</sup> mice showed no obvious abnormalities and appeared healthy. However, the litter numbers and litter sizes obtained from mating of *M1ap*<sup>KI/KI</sup> male mice with wild-type female mice were significantly reduced compared with those obtained from wild-type males, suggesting that *M1ap*<sup>KI/KI</sup> male mice were subfertile (Table EV2). *M1ap*<sup>KI/KI</sup> mice displayed smaller testes and lower sperm numbers than their control littermates (Fig EV2A–D). Histological analyses of testes from the control mice revealed the presence of numerous spermatogenic cells of all developmental stages (Fig 3A). However, seminiferous tubules of *M1ap*<sup>KI/KI</sup> mice contained many MMI spermatocytes with unaligned chromosomes and showed an obvious reduction in the number of postmeiotic germ cells (Fig 3A), similar to the observations in our patient.

### Increased prevalence of univalents in *M1ap*<sup>KI/KI</sup> MMI spermatocytes

The unaligned chromosomes in MMI spermatocytes may be a result of the absence of chiasmata between homologous chromosomes, which are usually present as univalents (Reynolds et al, 2013; Ma et al, 2022). Thus, we prepared metaphase chromosome spreads from control and *M1ap*<sup>KI/KI</sup> testes. Analysis of metaphase I chromosomes revealed that in control mice, 17.81% of MMI spermatocytes contained univalent chromosomes, among which 16.99% had only sex chromosome univalents and 0.82% had only autosome univalents (Fig 3B–E). However, univalent chromosomes were found in 67.81% of *M1ap*<sup>KI/KI</sup> MMI spermatocytes, with 45.19% having only sex chromosome univalents, 13.92% having only autosome univalents, and 8.70% having both autosome and sex chromosome univalents (Fig 3B–E). Hence, in *M1ap*<sup>KI/KI</sup> mice, autosomes and sex chromosomes are susceptible to precocious separation.

### *M1ap*<sup>KI/KI</sup> spermatocytes displayed reduced crossover formation

Univalents in MMI spermatocytes could be caused by crossover formation failure. To evaluate whether crossover formation was impaired after *M1ap* mutated, we quantified the number of MLH1 and MLH3 foci, which mark sites of crossovers. The average number of MLH1 foci per nucleus was  $23.89 \pm 0.17$  in control pachytene spermatocytes but  $20.78 \pm 0.21$  in *M1ap*<sup>KI/KI</sup> mice (Fig 3F and G). Similarly, the average number of MLH3 foci per nucleus was also reduced ( $23.09 \pm 0.23$  in controls vs.  $20.02 \pm 0.28$  in *M1ap*<sup>KI/KI</sup> mice; Fig EV2E and F). In control spermatocytes, autosomes without an MLH1 focus were seldom observed. In *M1ap*<sup>KI/KI</sup> mice, 3.64% of autosome pairs were detected without any MLH1 foci, in contrast to 0.62% in controls, and the ratio of autosome pairs with 2 or 3 MLH1 foci was significantly reduced compared with that in controls (Fig 3H). Consistent with the increased prevalence of XY univalent

in MMI cells, the frequency of cells with MLH1 focus on the pseudoautosomal region (PAR) was significantly lower in *M1ap*<sup>KI/KI</sup> mice (31.37%) than in control mice (67.53%), and we also noticed a higher frequency of cells with XY untouching in *M1ap*<sup>KI/KI</sup> pachytene spermatocytes (Fig 3I–K). In addition, autosomal synapsis,  $\gamma$ H2AX staining patterns, and meiotic prophase I progression in *M1ap*<sup>KI/KI</sup> mice were all comparable with those in controls (Fig EV2G and H). These observations together indicate that crossover formation is reduced on autosomes and particularly on the sex chromosomes in *M1ap*<sup>KI/KI</sup> mice.

### M1AP ablation decreases recombination intermediates in males

To explore why crossover formation was deficient in *M1ap*<sup>KI/KI</sup> spermatocytes, we first quantified the number of MSH4 foci, which mark recombination intermediates that are committed to be converted into crossovers. In *M1ap*<sup>KI/KI</sup> spermatocytes, MSH4 foci were observed specifically at synapsed regions of homologous chromosomes in a manner indistinguishable from that in control cells; however, the average numbers of MSH4 foci per cell were decreased compared with those in control spermatocytes at all stages examined, including early/mid zygotene, late zygotene, and early pachytene (Fig 4A and B).

The decreased recombination intermediates could be caused by impaired DSB formation, loading of recombination proteins, formation of recombination intermediates following strand invasion, or stabilization of recombination intermediates. To elucidate the defects in recombination, we quantified the kinetics of RAD51 and DMC1 foci at different substages of meiotic prophase. In control spermatocytes, RAD51 and DMC1 foci appear at leptotene; their numbers reach peaks at early/mid zygotene and gradually decline as DSB repair proceeds through pachytene. The numbers of RAD51 and DMC1 foci in *M1ap*<sup>KI/KI</sup> spermatocytes were comparable with those in control cells at leptotene, early/mid zygotene, and late zygotene stages (Fig 4C–F). However, we noticed significantly higher numbers of RAD51 and DMC1 foci at early pachytene in *M1ap*<sup>KI/KI</sup> spermatocytes than in control spermatocytes (Fig 4C–F). These findings lead us to conclude that there are no overt defects in meiotic DSB formation or loading of recombination proteins and strand invasion occurs, but recombination intermediates may not be formed successfully. Consistent with this, we also noticed that XY separation mainly occurs at early pachytene, as the frequency of cells with XY untouching at early pachytene was 33.5% in *M1ap*<sup>KI/KI</sup> mice, in contrast to 4.3% in control mice, and was increased to 56.1 and 21.5% in *M1ap*<sup>KI/KI</sup> and control mice, respectively (Fig 3J and K).

These results collectively suggest that ablation of M1AP in male mice decreases recombination intermediates.

### M1AP is dispensable for crossover formation and meiosis in oocytes

*M1ap* mRNA was detected in mouse fetal ovaries (Arango et al, 2006; Wang et al, 2020), but whether M1AP plays a role in female meiosis is unknown. We first examined the expression and localization of M1AP proteins in fetal oocytes. Western blotting confirmed the expression of M1AP protein in fetal ovaries at 16.5 days postcoitum (dpc), at a comparable level as in 14 dpp testes (Fig 5A). Intriguingly, immunofluorescence staining revealed that M1AP

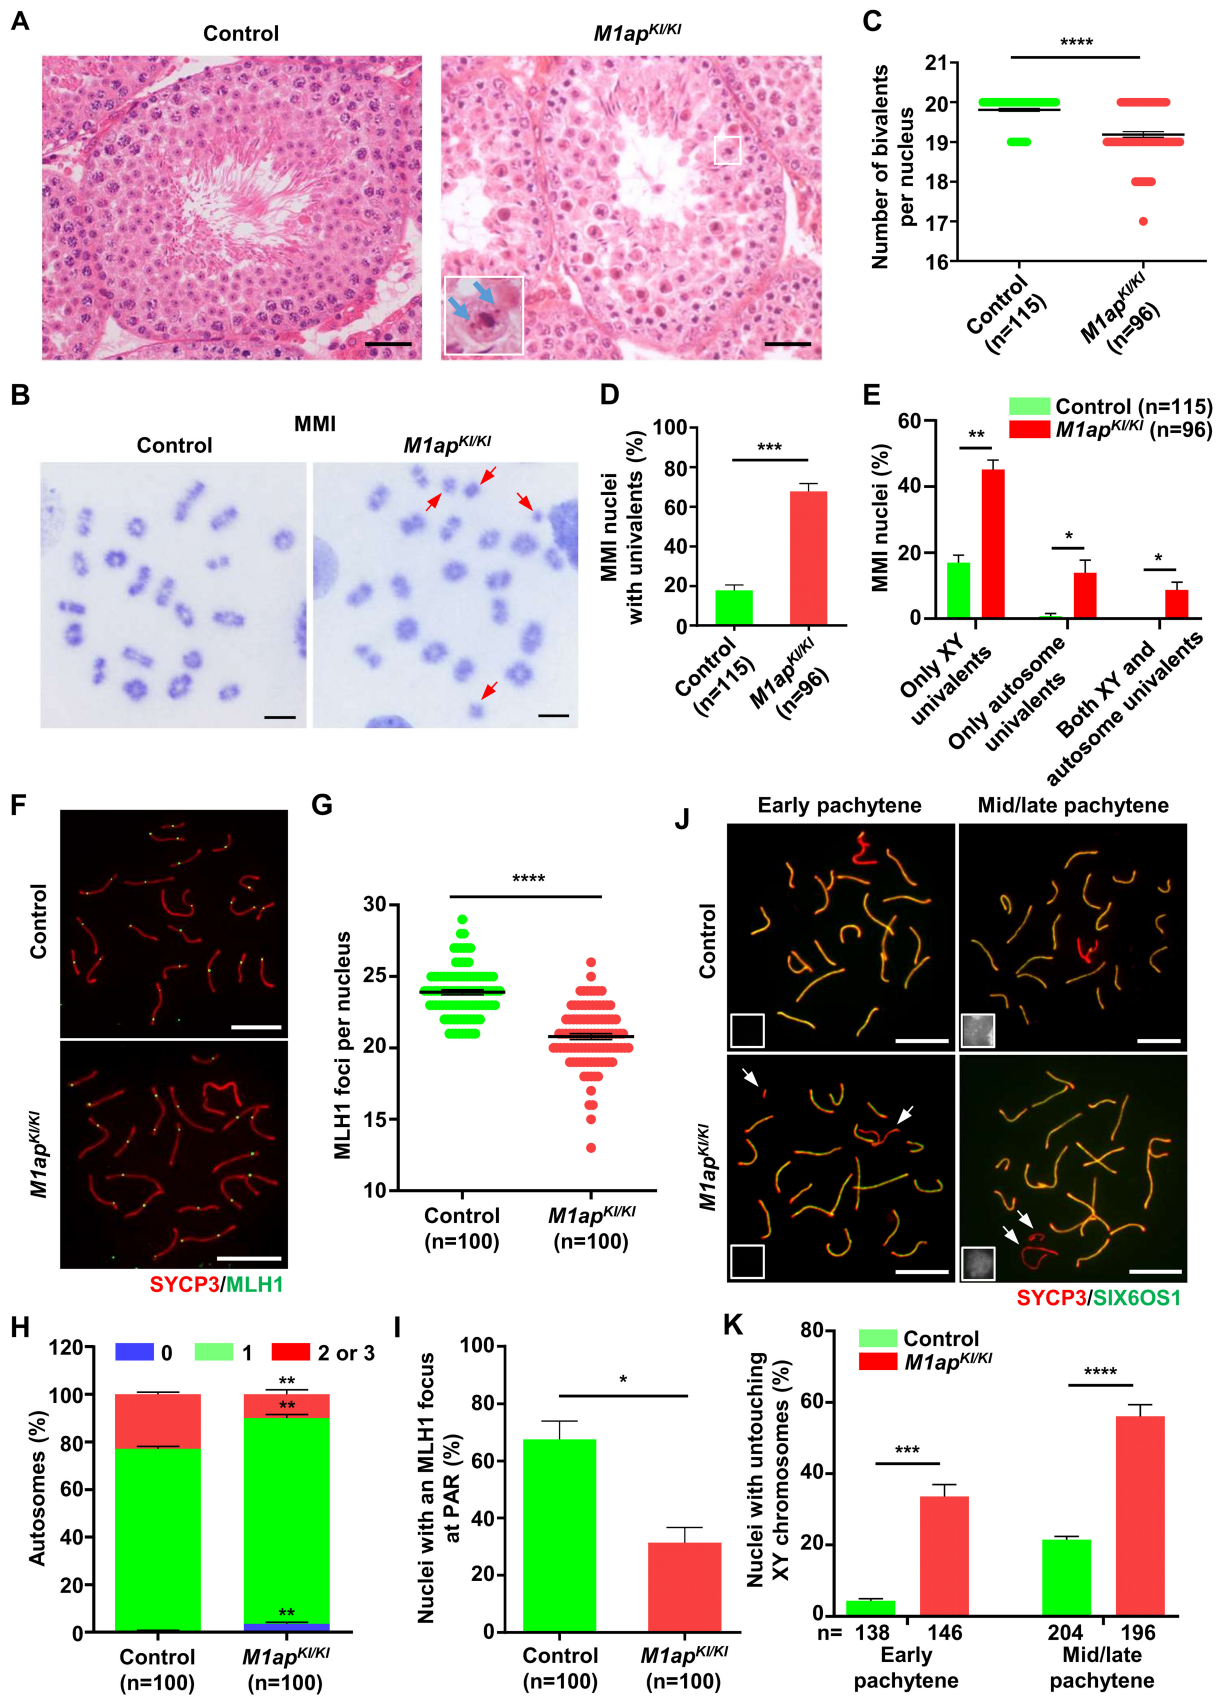

Figure 3.

**Figure 3. Meiotic arrest at metaphase I caused by decreased crossovers in *M1ap*<sup>KI/KI</sup> male mice.**

- A Testicular histology from 8-week-old control and *M1ap*<sup>KI/KI</sup> mice. The magnified view of the boxed area is shown in the lower left corner of the image of *M1ap*<sup>KI/KI</sup> mice. The blue arrow indicates unaligned chromosomes in the representative metaphase cells. Scale bars, 50  $\mu$ m.
- B Meiotic metaphase I (MMI) spermatocytes stained with Giemsa. The arrows indicate univalent chromosomes. Scale bars, 10  $\mu$ m.
- C Number of bivalents per nucleus.
- D Frequencies of nuclei with univalents.
- E Frequencies of nuclei with only XY univalents, only autosome univalents, or both XY and autosome univalents.
- F Representative spread spermatocytes stained for SYCP3 (green) and MLH1 (red). Scale bars, 10  $\mu$ m.
- G Number of MLH1 foci per nucleus.
- H Frequencies of autosomal chromosomes with 0, 1, and 2 or 3 MLH1 foci.
- I Frequencies of nuclei with an MLH1 focus at the pseudoautosomal region (PAR) of XY chromosomes.
- J Representative spread spermatocytes stained for the lateral element (SYCP3, green) and the central element (SIX6OS1, red) in early and mid/late pachynema. Miniaturized H1t staining (white) images are shown in the left lower corner of the overlay images. The arrows indicate the untouched XY chromosomes. Scale bars, 10  $\mu$ m.
- K Quantification of nuclei with XY untouching in early and mid/late pachynema.

Data information: (C–E, G, and H–K), Data are presented as the mean  $\pm$  SEM. *n*, the number of cells scored from three biological replicates. \**P* < 0.05; \*\**P* < 0.01; \*\*\**P* < 0.001; \*\*\*\**P* < 0.0001; two-tailed Student's *t*-test.

signals were barely detected in spread oocyte nuclei (Fig 5B). We speculated that M1AP protein may not localize in the nucleus in oocytes. We thus performed confocal laser scanning microscopy analyses of M1AP localization on spermatocyte and oocyte smears. As expected, M1AP signals were detected in the nuclei of zygotene/pachytene spermatocytes, forming discrete foci; by contrast, diffused M1AP signals were detected only in the cytoplasm, but not in the nucleus, of zygotene/pachytene oocytes (Fig 5C). In congruent with this, we did not observe any obvious difference in the number of MLH3 foci between *M1ap*<sup>KI/KI</sup> and control oocytes at 18.5 dpc (Fig 5D and E), nor in the numbers of total oocytes, primordial follicles, and primary follicles between control and the mutant mice at 5 dpp (Fig 5F and G), suggesting that the crossover formation and follicle development were not affected after M1AP ablation. Moreover, mating of *M1ap*<sup>KI/KI</sup> female mice with wild-type male mice produced normal numbers of offspring (Table EV3).

Taken together, these results indicate that M1AP protein is expressed but shows cytoplasmic localization in fetal oocytes and is dispensable for female meiosis and fertility.

***M1ap*<sup>-/-</sup> mice resemble the meiotic defects of *M1ap*<sup>KI/KI</sup> mice**

In our *M1ap*<sup>KI/KI</sup> males, crossover formation was reduced owing to decreased recombination intermediates, while autosomal pairing and synapsis were normal. However, *M1ap*<sup>Iz/Iz</sup> mice, carrying hypomorphic alleles in the *M1ap* gene, displayed Sertoli-cell-only seminiferous tubules, prolonged retention of  $\gamma$ H2AX on chromosome axes, nonhomologous pairing, and synaptic defects on autosomes (Arango et al, 2013). The phenotypic differences raised the possibility that the trace amount of M1AP protein in *M1ap*<sup>KI/KI</sup> testes may retain some function. To test this possibility, we generated *M1ap*<sup>-/-</sup> mice using CRISPR/Cas9 technology (Fig EV3A). *M1ap*<sup>-/-</sup> mice carried a 10-base-pair deletion in exon 4, which introduced a premature stop codon (Fig EV3B). Western blotting and immunofluorescence staining of spermatocyte spreads confirmed the absence of M1AP proteins in *M1ap*<sup>-/-</sup> mice (Fig EV3C and D).

Similar to the observations in *M1ap*<sup>KI/KI</sup> mice, *M1ap*<sup>-/-</sup> mice had smaller testes and lower sperm numbers than their control littermates (Fig EV4A–C). Histological analyses of *M1ap*<sup>-/-</sup> testes also revealed the presence of many MMI spermatocytes with obvious unaligned chromosomes and a reduction in the number of

postmeiotic germ cells (Fig EV4D). Immunofluorescence staining of the spread spermatocytes from *M1ap*<sup>-/-</sup> mice revealed that meiotic prophase I progression was normal and autosomes were properly synapsed, while XY untouching was frequently observed (Fig EV4E–G). The average number of MLH3 foci per nucleus was decreased (20.86  $\pm$  0.19 in *M1ap*<sup>-/-</sup> mice vs. 23.72  $\pm$  0.16 in controls), leading to increased frequencies of univalent sex chromosomes and/or autosomes at the MMI in *M1ap*<sup>-/-</sup> mice (Fig EV4H–M). All these findings recapitulated the observations in *M1ap*<sup>KI/KI</sup> mice (Figs 3 and EV2) and indicated that *M1ap*<sup>-/-</sup> mice have the same meiotic defects as *M1ap*<sup>KI/KI</sup> mice.

**M1AP interacts with ZZZ proteins**

To explore the molecular mechanism by which M1AP promotes meiotic recombination, we performed co-immunoprecipitation (IP) in lysates from 10-week-old wild-type mouse testes using the anti-M1AP antibody, followed by mass spectrometry (MS) analysis. Interestingly, in addition to M1AP, two ZZZ proteins, TEX11 and SHOC1, were among the top three on the candidate interacting protein list (Fig 6A and Table EV4). Western blotting using anti-TEX11 and anti-SHOC1 antibodies validated that M1AP interacts with TEX11 and SHOC1 in mouse testes (Fig 6B). To further confirm the interaction between M1AP and the ZZZ complex, we performed co-IP in lysates of HEK-293T cells co-expressing M1AP with SHOC1, TEX11, or SPO16. The results showed that M1AP interacts with all three ZZZ complex components (Fig 6C).

**The localization pattern of M1AP foci resembles that of ZZZ proteins**

ZZZ proteins are known to localize at recombination intermediates during meiosis (Shinohara et al, 2008; Yang et al, 2008b; Zhang et al, 2018, 2019b). The kinetics of M1AP foci and the interaction between M1AP and the ZZZ complex suggest that M1AP should have a cellular localization pattern similar to that of ZZZ proteins. To test this hypothesis, we performed immunofluorescence staining for M1AP and TEX11, and found that they showed a high degree of colocalization on chromosome axes (Fig 7A). In late zygonema, the average fraction of M1AP foci colocalizing with TEX11 was 95.90  $\pm$  0.53%, and the average fraction of TEX11 colocalizing with

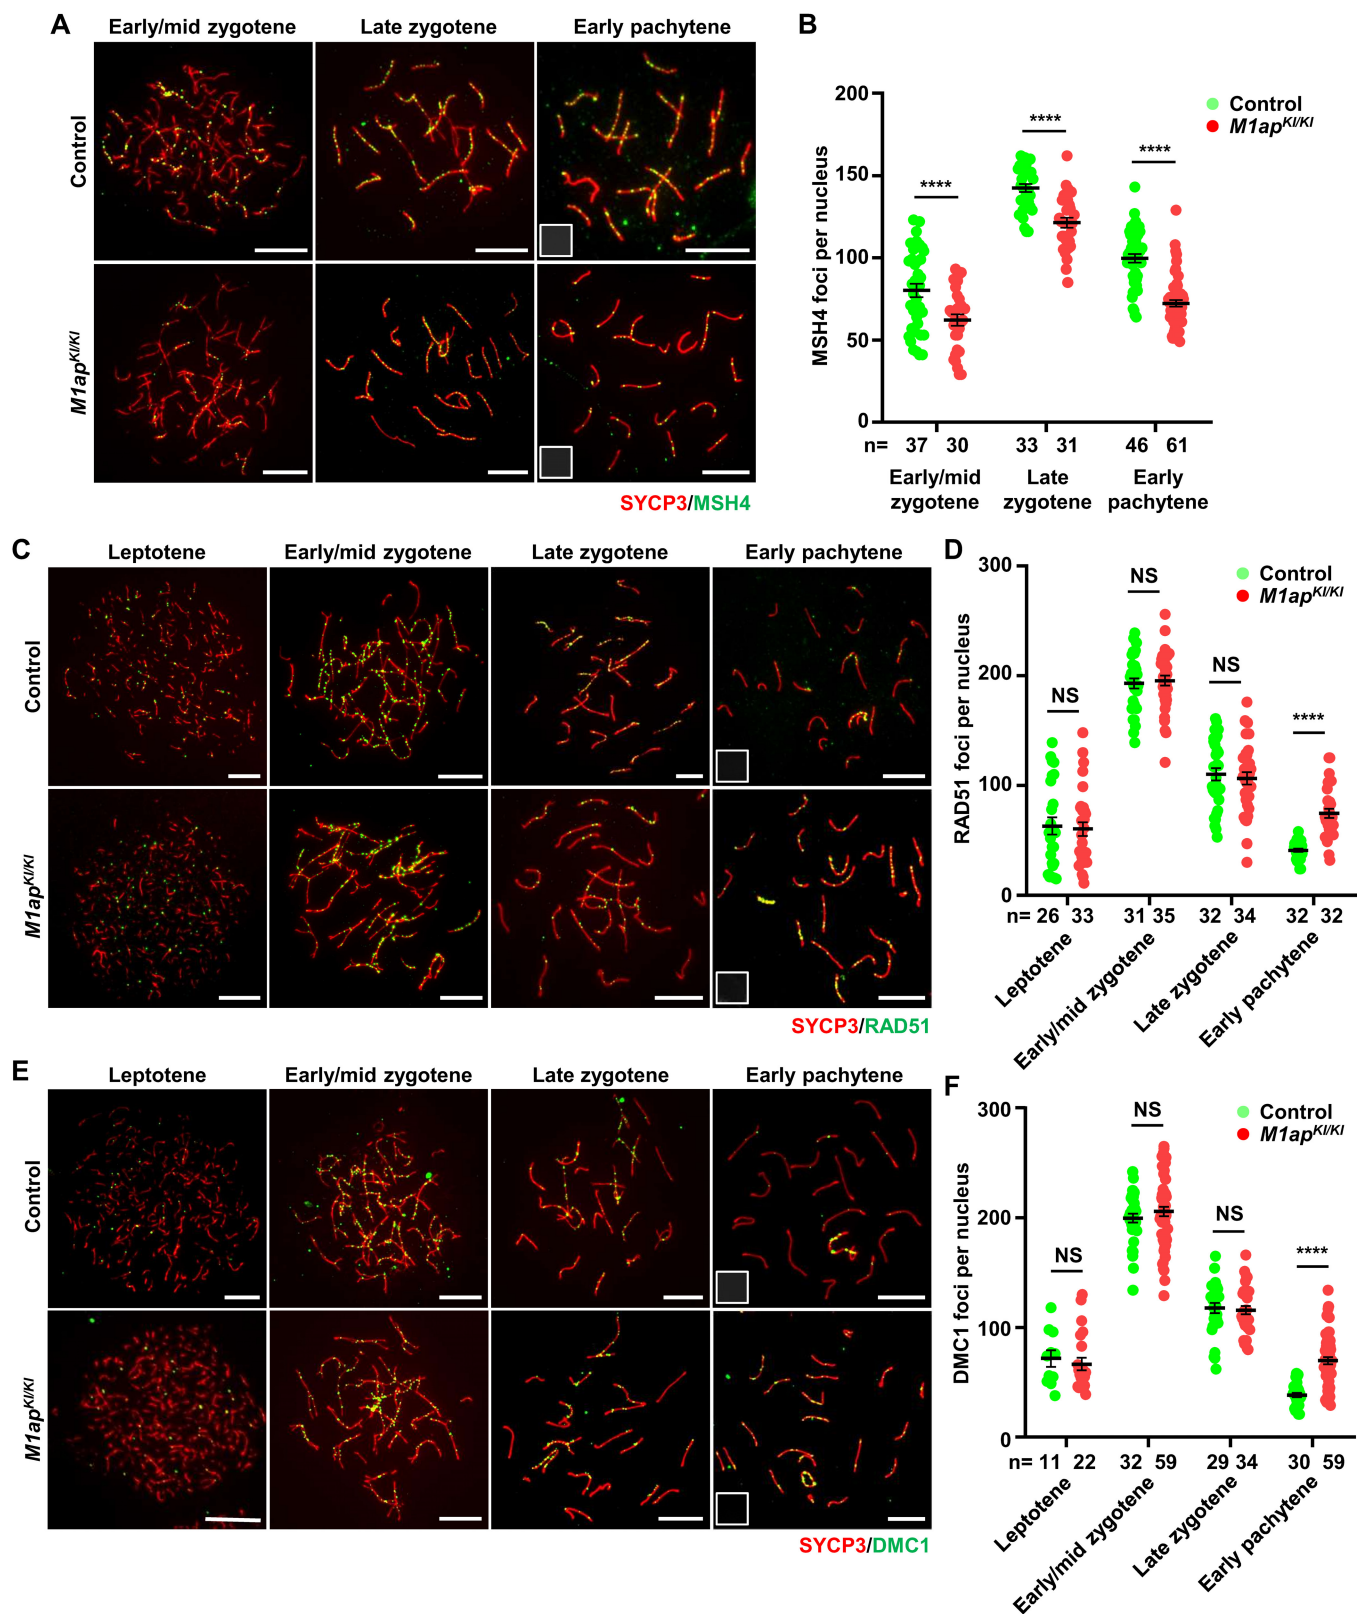

Figure 4.



**Figure 4. Decreased recombination intermediates in *M1ap*<sup>KI/KI</sup> male mice.**

- A Immunofluorescence staining with antibodies against SYCP3 (red) and MSH4 (green) on spermatocyte spreads. Scale bars, 10  $\mu$ m.  
 B The mean number of MSH4 foci per nucleus in control and *M1ap*<sup>KI/KI</sup> spermatocytes at the indicated stages.  
 C Immunofluorescence staining with antibodies against SYCP3 (red) and RAD51 (green) on spermatocyte spreads. Scale bars, 10  $\mu$ m.  
 D The mean number of RAD51 foci per nucleus in control and *M1ap*<sup>KI/KI</sup> spermatocytes at the indicated stages.  
 E Immunofluorescence staining with antibodies against SYCP3 (red) and DMC1 (green) on spermatocyte spreads. Scale bars, 10  $\mu$ m.  
 F The mean number of DMC1 foci per nucleus in control and *M1ap*<sup>KI/KI</sup> spermatocytes at the indicated stages.

Data information: (B, D and F), Data are presented as the mean  $\pm$  SEM. *n*, the number of cells scored from at least three biological replicates. \*\*\*\**P* < 0.0001; NS, not significant; two-tailed Student's *t*-test.

M1AP was  $96.35 \pm 0.71\%$  (Fig 7B). Moreover, we found that M1AP foci seldom colocalized with DMC1 ( $14.04 \pm 1.63\%$ ; Fig 7C and D), which marks resected 3'-ssDNAs, but showed a high frequency of colocalization with RPA2 ( $88.10 \pm 1.07\%$ ) at the early pachytene stage, which marks the sites of early recombination intermediates (Fig 7E and F). Intriguingly, similar to SPO16, M1AP foci were also detected on the asynapsed chromosome axes of *Dmc1*<sup>-/-</sup> spermatocytes (Fig 7G), in which meiosis is arrested at a zygotene-like stage without synapsis (Pittman et al, 1998), suggesting that M1AP foci may also localize at intersister chromatid joint molecules.

**M1AP facilitates TEX11 recruitment**

The interaction and similar localization pattern between M1AP and ZSS proteins indicate that they may have similar functions. To dissect the association between M1AP and the ZSS complex in meiotic recombination, we examined the localization of M1AP in spread spermatocytes from *Spo16*<sup>-/-</sup> mice (Appendix Fig S2A and B), in which the assembly of MSH4/TEX11-marked recombination intermediates was completely abolished (Zhang et al, 2019b). Immunofluorescence staining of spread spermatocytes showed the absence of M1AP foci in *Spo16*<sup>-/-</sup> mice (Fig 7G), indicating that M1AP localization on chromosome axes depends on SPO16. To understand the impact of M1AP ablation on the ZSS complex, we performed immunofluorescence staining for SHOC1 and TEX11 in *M1ap*<sup>KI/KI</sup> spermatocytes. No obvious differences were observed in the number of SHOC1 foci between control and *M1ap*<sup>KI/KI</sup> spermatocytes (Fig EV5A and B), whereas the numbers of TEX11 foci were reduced in *M1ap*<sup>KI/KI</sup> spermatocytes compared with control cells from the early/mid zygotene to early pachytene stages (Fig 7H and I). Notably, in early pachytene cells with XY chromosomes touching, the frequency of nuclei with TEX11 foci at the PAR did not differ from that in controls (Fig 7J), which is in line with the observation that XY separation predominantly occurs at early pachytene (Fig 3K). Besides, the number of TEX11 foci in late zygotene or early pachytene oocytes showed no obvious difference between *M1ap* mutant and control embryos (Appendix Fig S3A and B). Taken together, we conclude that M1AP acts as a partner of the ZSS complex and facilitates the recruitment of TEX11, thereby stabilizing recombination intermediates in males (Fig 7K).

**Discussion**

Our study identified a homozygous *M1AP* splicing mutation (c.1074 + 2T > C) in a consanguineous Pakistani family with two brothers exhibiting MMI arrest and severe oligozoospermia. The

pathogenicity of the mutation was validated using mouse models mimicking the *M1AP* mutation of our patients. Moreover, we found that M1AP interacts with the ZSS complex and facilitates TEX11 recruitment at recombination intermediates, promoting optimal crossover formation and meiotic progression in males.

Arango et al (2013) described the phenotype of mice carrying hypomorphic alleles in the *M1ap* gene (*M1ap*<sup>lz/lz</sup>), in which a lacZ-neomycin ( $\beta$ -geo) cassette was introduced into intron 6 of the *M1ap* gene and led to variously reduced M1AP protein expression. They reported the presence of Sertoli-cell-only tubules in *M1ap*<sup>lz/lz</sup> testes and nonhomologous pairing of autosomes, XY asynapsis, retained  $\gamma$ H2AX signals on the autosomes as late as diakinesis, and deficient crossover formation in *M1ap*<sup>lz/lz</sup> spermatocytes, which consequently resulted in severe oligozoospermia and male infertility (Arango et al, 2013). In our study, both lines of the *M1ap* mutant mice, *M1ap*<sup>KI/KI</sup> and *M1ap*<sup>-/-</sup>, showed very similar phenotypes that produced spermatozoa approximately one-third of that in the control mice. Consistent with the observation in *M1ap*<sup>lz/lz</sup> mice, we also observed an increased frequency of XY untouching and reduced crossover formation, but we did not find any seminiferous tubules containing only Sertoli cells or abnormal synapses and persistent  $\gamma$ H2AX signals on the autosomes. We believe that disruption of M1AP not resulting in Sertoli cell only seminiferous tubules is consistent with M1AP being first detected in testes at 10 dpp when leptotene spermatocytes appear, suggesting that *M1ap* ablation is not likely to affect early spermatogonia. Intriguingly, the meiotic defects in our *M1ap*<sup>KI/KI</sup> mice and *M1ap*<sup>-/-</sup> mice appeared much milder than those in the *M1ap*<sup>lz/lz</sup> mice. The possibility that the predicted truncated proteins in *M1ap*<sup>KI/KI</sup> mice and *M1ap*<sup>-/-</sup> mice (approximately two-thirds and one-third of the wild-type protein length, respectively) may be produced and retain some function of M1AP gives a potential explanation. However, due to the lack of antibodies against the M1AP N-terminus, we were unable to test this hypothesis. Future studies aimed at further dissecting the molecular function of M1AP in meiosis are warranted.

M1AP interacting with all three components of the ZSS complex and colocalizing with TEX11 suggest that M1AP likely functions as a copartner of the ZSS complex in meiotic recombination. Intriguingly, mice with any of the four genes knocked out have a different phenotype. Knockout of *Shoc1* leads to the most severe phenotype—meiotic arrest at a zygotene stage with a complete absence of axial localization of the other two ZSS proteins (Zhang et al, 2018). *Spo16*<sup>-/-</sup> mice exhibited meiotic arrest at a zygotene-like or early pachytene-like stage and the synapsis was less affected than in *Shoc1*<sup>-/-</sup> mice (Zhang et al, 2019b). In *Spo16*<sup>-/-</sup> spermatocytes, SHOC1 foci were reduced, and M1AP and TEX11 foci were completely abolished, suggesting that SPO16 likely stabilizes SHOC1 and

recruits M1AP and TEX11 at the recombination intermediates. In *Tex11*<sup>-/-</sup> mice, asynapsed chromosomes (two to 10 per nucleus) were seen in 38% of pachytene spermatocytes, crossovers could form but reduced, and meiosis arrested at the MMI (Adelman &

Petrini, 2008; Yang et al, 2008b). Our present study revealed that M1AP disruption leads to a mild crossover reduction and a partial MMI arrest with no overt effect on autosomal synapsis. In *M1ap*-deficient spermatocytes, the numbers of RAD51 and DMC1 foci were

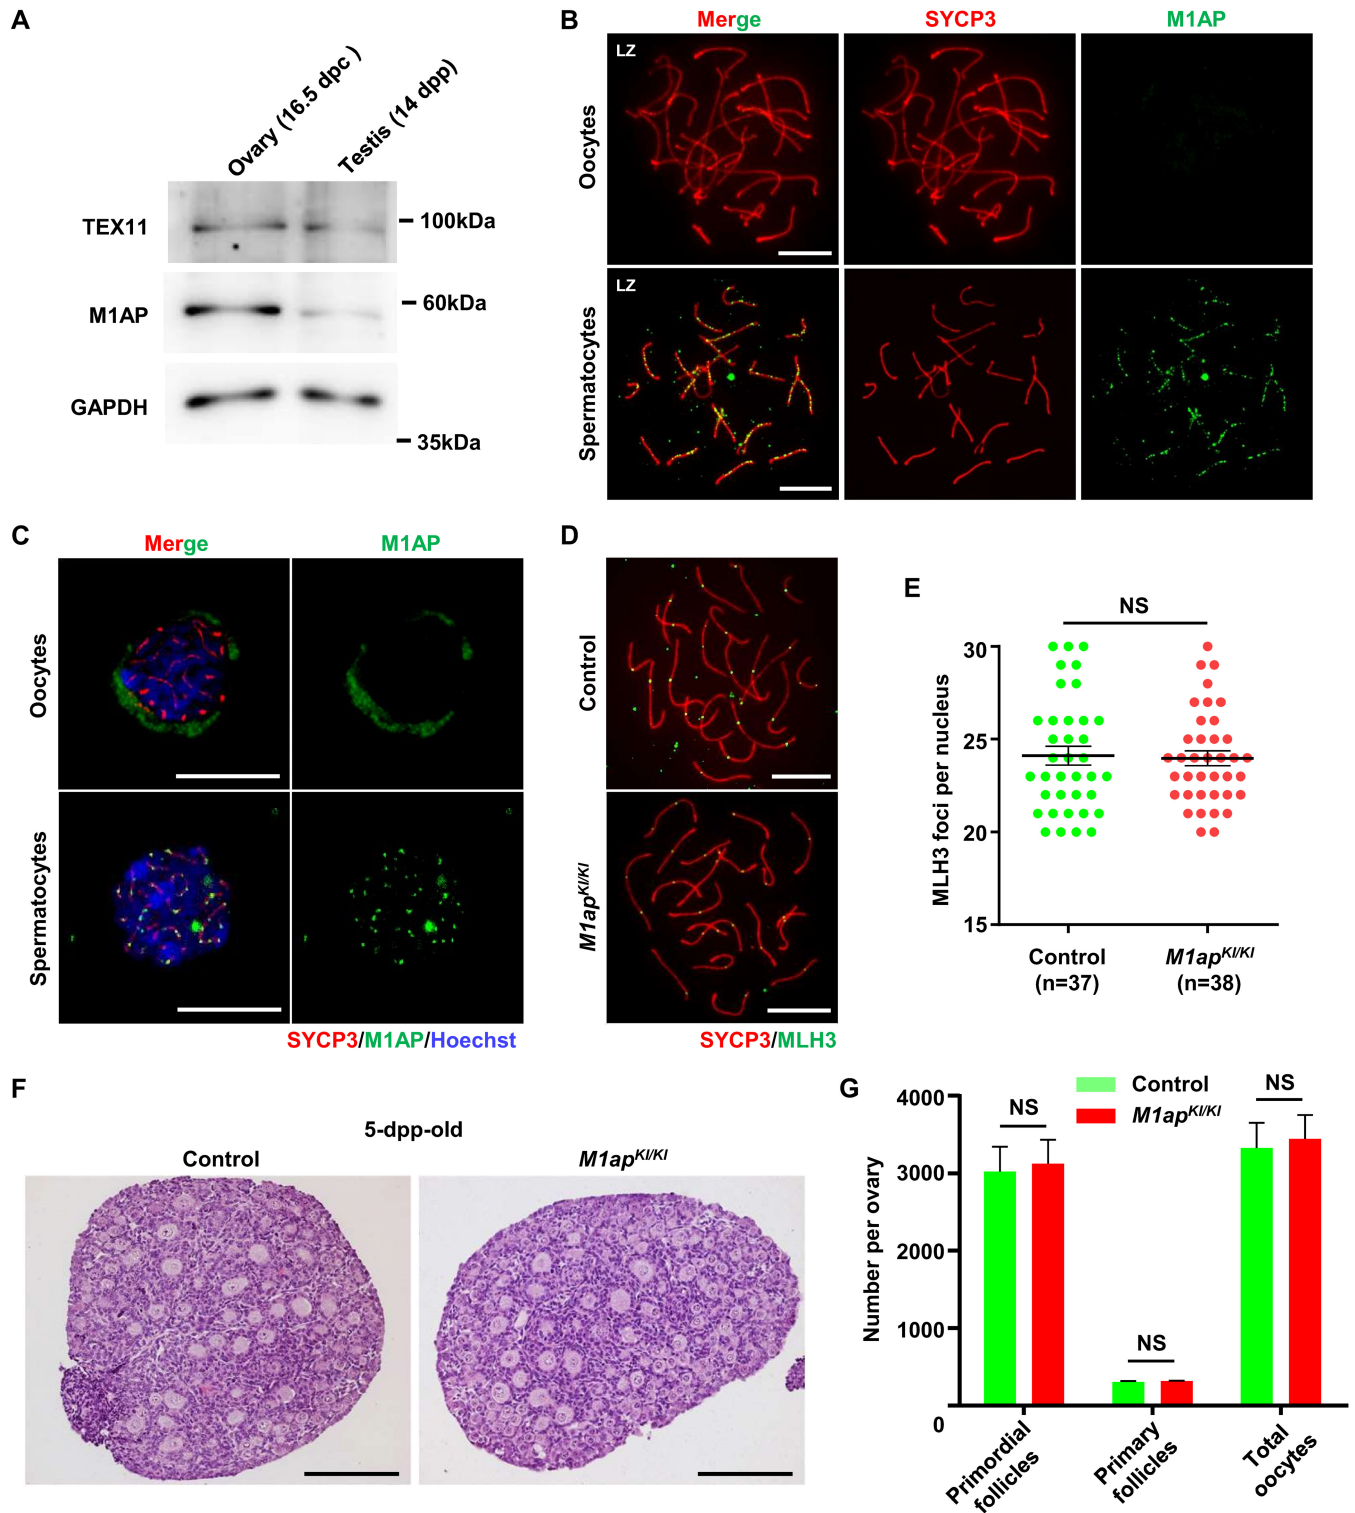

Figure 5.

**Figure 5. M1AP shows cytoplasmic localization in fetal oocytes, and is dispensable for crossover formation in female mice.**

- A Western blot analysis of M1AP and TEX11 expression in fetal ovaries (16.5 days postcoitum (dpc)) and testes (14 dpp) from WT mice. GAPDH served as the loading control.
- B Immunofluorescence staining of M1AP (green) and SYCP3 (red) on meiotic spreads of fetal ovaries (16.5 dpc) and adult testes from WT mice. Scale bars, 10  $\mu$ m.
- C Confocal imaging of zygotene/pachytene meiocytes on cell smears of fetal ovaries (16.5 dpc) and adult testes from WT mice after immunofluorescence staining of M1AP (green) and SYCP3 (red). Scale bars, 10  $\mu$ m.
- D Immunofluorescence staining with antibodies against SYCP3 (red) and MLH3 (green) on oocyte spreads from control and *M1ap*<sup>KI/KI</sup> embryos (18.5 dpc). Scale bars, 10  $\mu$ m.
- E Number of MLH3 foci per cell in control and *M1ap*<sup>KI/KI</sup> oocytes.
- F Representative haematoxylin-stained ovarian sections of 5-dpp-old control and *M1ap*<sup>KI/KI</sup> mice. Scale bars, 50  $\mu$ m.
- G Follicle counts and total oocyte counts per ovary at 5 dpp.

Data information: (E) Data are presented as the mean  $\pm$  SEM. *n* shows the number of cells scored from two biological replicates. (G) Data are presented as the mean  $\pm$  SEM of three biological replicates. NS, not significant; two-tailed Student's *t*-test.

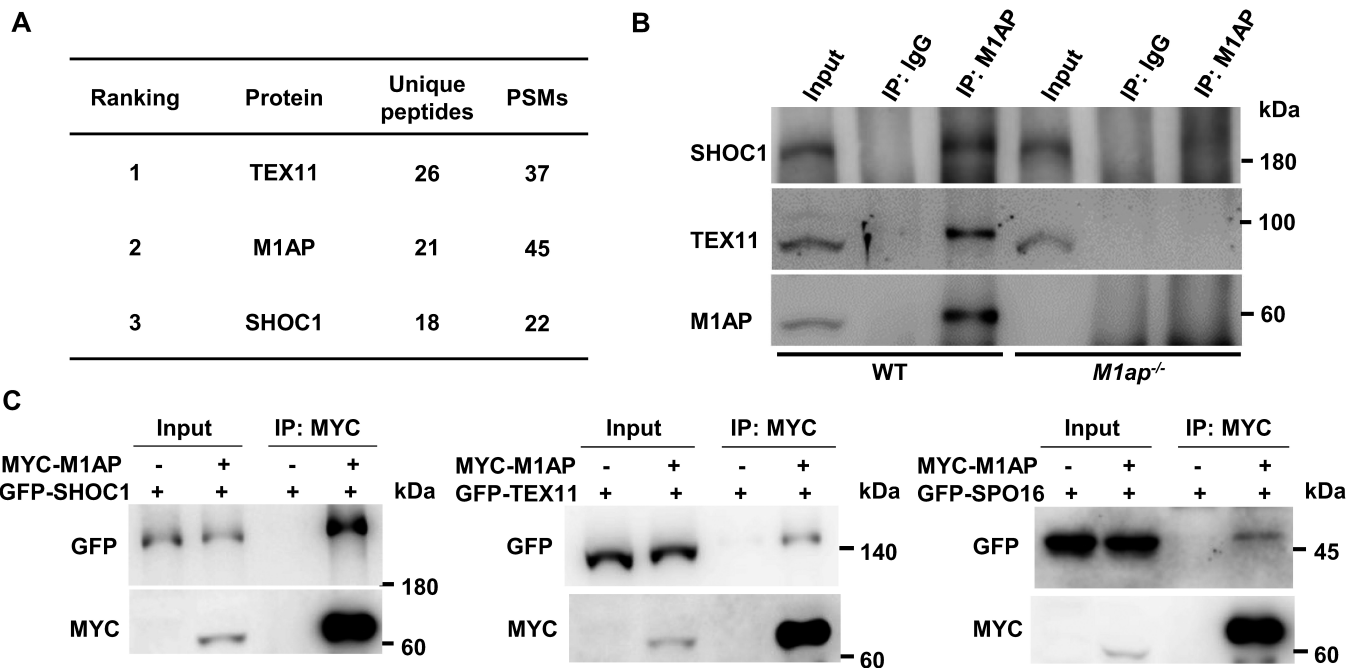

**Figure 6. M1AP interacts with the ZYS complex.**

- A Identification of proteins interacting with M1AP by coimmunoprecipitation and mass spectrometry (co-IP/MS). The top three candidates on the ranking list sorted by the number of unique peptides are shown. PSMs, peptide-spectrum matches.
- B Co-IP using anti-M1AP antibody with whole-testis lysates of WT mice and *M1ap*<sup>-/-</sup> mice, followed by western blot analyses of M1AP, SHOC1, and TEX11.
- C Co-IP detecting the interaction between M1AP (fused with an N-terminal MYC tag) and each of the ZYS complex components (fused with an N-terminal GFP tag) exogenously expressed in HEK-293T cells.

increased at early pachytene stages, suggesting that the recombination intermediates formed following strand invasion are likely unstable and subject to precocious dismantling, leading to delayed DSB repair, which are similar to the observations in *Tex11* knockouts (Adelman & Petrini, 2008). Consistently, normal localization of SHOC1 but reduced number of TEX11 foci were observed. The number of TEX11 foci was reduced from the early/mid zygotene stage, and the reduction was maintained at the same level during the following stages, implying that the recruitment, but not the stabilization, of TEX11 on chromosome axes is affected in *M1ap* mutant mice. This was further supported by the finding that XY separation occurs predominantly at early pachytene in *M1ap* mutant mice and

that the ratio of nuclei with TEX11 foci at the PAR in spread early pachytene spermatocytes with XY touching did not differ from that in controls. These findings lead us to propose that, following strand invasion, M1AP is recruited to recombination intermediates by SPO16 and stabilizes these early-stage intermediates by promoting the recruitment of TEX11 but may be dispensable for stabilization and processing of intermediates at the later stages.

The disruption of M1AP seems to have a greater impact on crossover formation at the PAR of sex chromosomes than on autosomes. In *M1ap* mutant mice, the frequencies of cells with XY untouching and cells lacking an MLH1 focus at the PAR were approximately 30% higher than that in control mice, indicating that the number of early-stage recombination

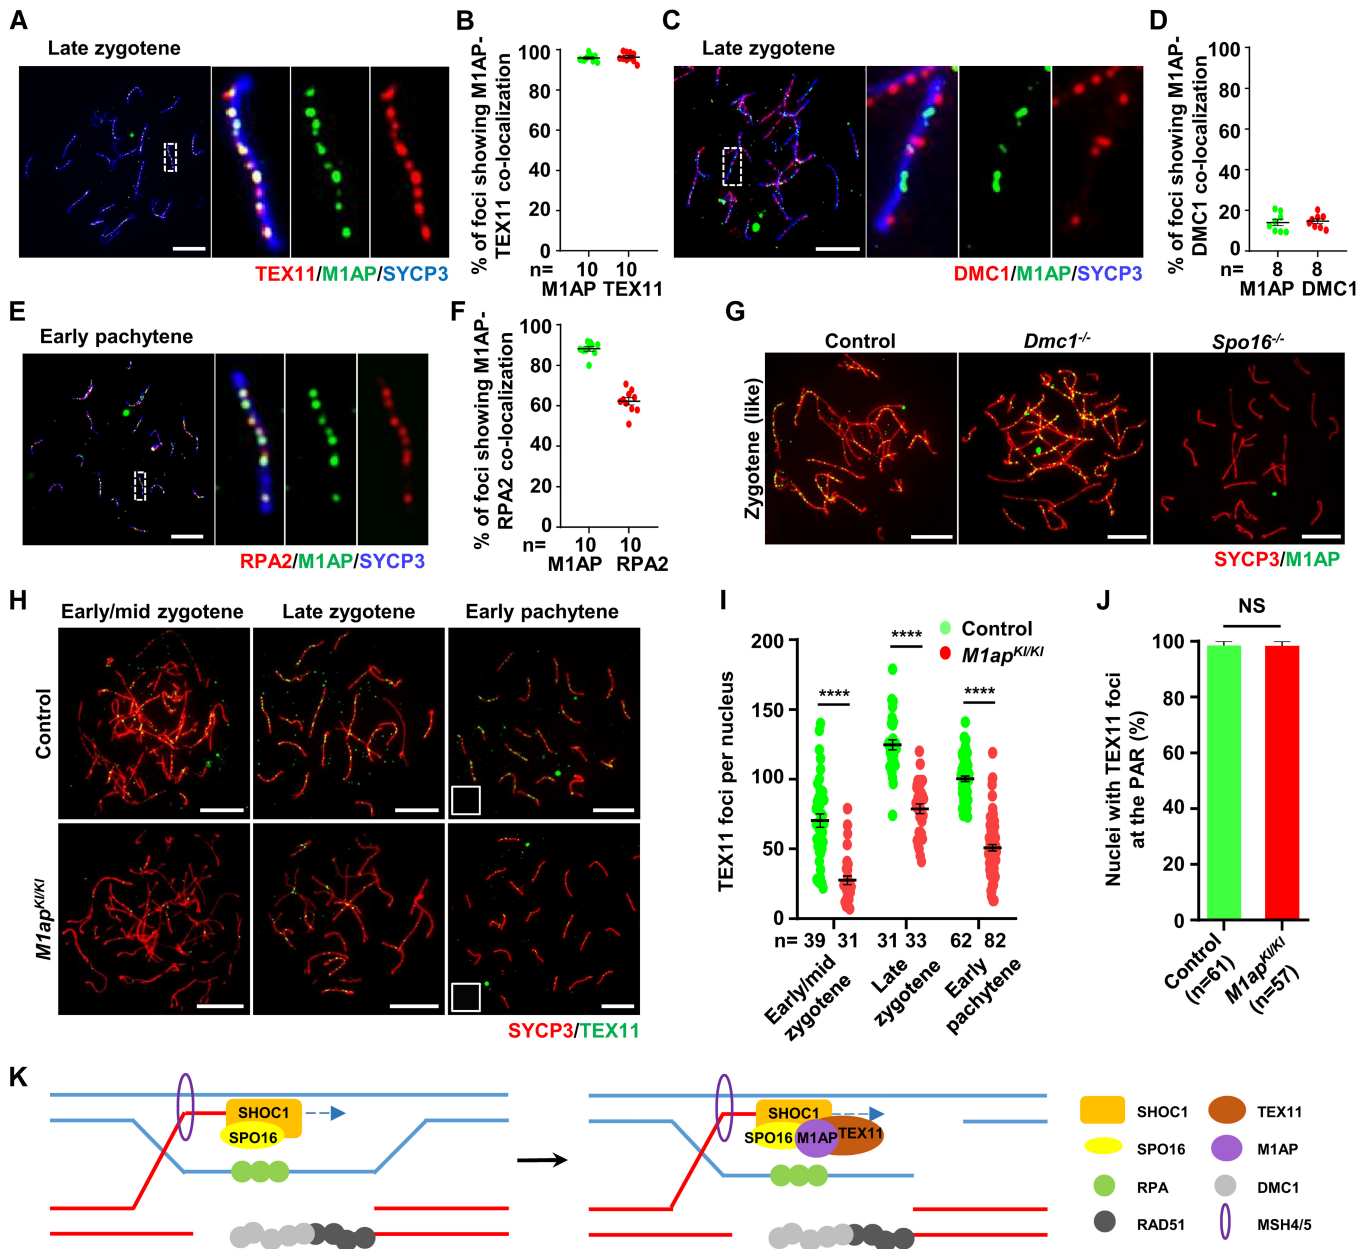

**Figure 7. M1AP colocalizes with TEX11 and facilitates TEX11 recruitment at the recombination intermediates.**

- A Immunofluorescence staining of M1AP (green) and TEX11 (red) on the spermatocyte spreads of WT mice.
- B Ratios of M1AP-TEX11 co-localizing foci to the M1AP total foci or TEX11 total foci at the indicated meiotic prophase substages. Each dot represents the ratio calculated from one nucleus.
- C Immunofluorescence staining of M1AP (green) and DMC1 (red) on the spermatocyte spreads of WT mice.
- D Ratios of M1AP-DMC1 co-localizing foci to the M1AP total foci or DMC1 total foci at the indicated meiotic prophase substages. Each dot represents the ratio calculated from one nucleus.
- E Immunofluorescence staining of M1AP (green) and RPA2 (red) on the spermatocyte spreads of WT mice.
- F Ratios of M1AP-RPA2 co-localizing foci to the M1AP total foci or RPA2 total foci at the indicated meiotic prophase substages. Each dot represents the ratio calculated from one nucleus.
- G Immunofluorescence staining of M1AP (green) and SYCP3 (red) on spermatocyte spreads of control, *Dmc1*<sup>-/-</sup> or *Spo16*<sup>-/-</sup> mice.
- H Immunofluorescence staining of TEX11 (green) and SYCP3 (red) on the spermatocyte spreads of control and *M1ap*<sup>Ki/Ki</sup> testes.
- I The mean number of TEX11 foci per cell in control and *M1ap*<sup>Ki/Ki</sup> spermatocytes.
- J Frequencies of nuclei with TEX11 foci detected at the PAR in spread early pachytene spermatocytes with touching XY chromosomes.
- K Schematic diagram showing a proposed model in which M1AP acts as a partner of the ZZS complex in meiotic recombination in mouse meiotic prophase I. M1AP is recruited by SPO16 and facilitates TEX11 recruitment to stabilize recombination intermediates.

Data information: (A, C, E, G, and H) Scale bars, 10  $\mu$ m. (B, D, F, I, and J) Data are presented as the mean  $\pm$  SEM. n shows the number of cells scored from at least two biological replicates. (I and J) \*\*\*\*P < 0.0001; NS, not significant; two-tailed Student's t-test.

intermediates was reduced by approximately one-third. However, we did not observe any obvious defects in autosomal synapses, and the number of nucleus-wide MLH1 foci was reduced by 13.02% in the mutants. The milder reduction in crossovers on autosomes could be explained by the crossover homeostasis (Cole *et al*, 2012; Wang *et al*, 2015). It is reasonable to postulate that when an early-stage recombination intermediate is precociously dismantled, recombination intermediates nearby would have the opportunity to take over to generate an MLH1 crossover, thus buffering the perturbations on the ultimate number of crossovers. Given that the X and Y chromosomes have only a small region of homology (PAR), only one or two DSBs are produced in the tiny PAR (Kauppi *et al*, 2011). The compensation from adjacent intermediates through the homeostatic mechanism is limited and thus renders a higher susceptibility of the PAR to the decreased early-stage recombination intermediates than autosomes.

The sexual dimorphisms in M1AP localization patterns and meiotic phenotypes of *M1ap* mutant mice indicate that M1AP, unlike the other ZZS proteins (Yang *et al*, 2008b; Zhang *et al*, 2018, 2019b), acts as a sex-dependent regulator of meiotic recombination. The recruitment of TEX11 requires M1AP in spermatocytes but not in oocytes also underlines that early-stage recombination intermediates are differentially regulated between males and females. Several meiotic recombination-related proteins, despite expression in both spermatocytes and oocytes, have been found to exhibit sexually dimorphic functions in mammals, with a specific phenotype in males but not females when knocked-out (Hua & Liu, 2021). For example, *Tex15<sup>-/-</sup>* male mice were infertile and exhibited complete losses of RAD51 and DMC1 foci on chromosome axes, which, however, were not observed in the mutant females (Yang *et al*, 2008a). RAD51AP2 foci were detected in both spermatocytes and oocytes, but this protein is required for crossover formation only on XY chromosomes but not on XX and autosomes in mice (Ma *et al*, 2022). In addition, knockout of *Meilb2* or *Zcwpw1* also results in a much more severe meiotic DSB repair defects in males than in females (Li *et al*, 2019; Zhang *et al*, 2019a). Thus, our study further substantiates the awareness that the meiotic recombination in males may require additional factors, might owing to the longer meiotic DSB repair duration in males (7–8 days) than in females (4–5 days; Baudat *et al*, 2013) and the specific mechanism to ensure X-Y recombination within the tiny homologous region (i.e., PAR), which is worthy of further investigations.

In conclusion, our study demonstrates that M1AP is a pathogenic gene for male infertility and that its mutation causes meiosis arrest at the metaphase I stage owing to unaligned chromosomes during spermatogenesis in humans and mice. Moreover, our study reveals the molecular role of M1AP in male meiotic recombination—cooperating with the ZZS complex in the stabilization of recombination intermediates. All these findings allow an in-depth understanding of the role of M1AP and ZZS proteins in meiotic recombination, shed a new perspective for the differences between male and female meiosis, and provide a scientific basis for genetic counseling and diagnosis of male infertility.

## Materials and Methods

### Clinical samples

A consanguineous Pakistani family, having two brothers diagnosed with idiopathic male infertility, was enrolled in this study. Written

informed consent was received from all participants prior to the onset of the study. For both patients, the reproductive hormones in the serum were examined in local laboratories; chromosome analysis revealed a normal karyotype, and no Y-chromosome microdeletions were detected. Semen analyses were performed at least three times for each patient, following the guidelines of the World Health Organization (WHO, 2010). This study was approved by the institutional ethics committee of the University of Science and Technology of China (USTC approval number 2019-KY-168).

### WES and variant filtration

Genomic DNA was extracted from blood samples for the two patients (V:2 and V:3) and their fertile brother (V:1) using a QIAamp Blood DNA Mini Kit (QIAGEN, 51106). WES and subsequent bioinformatics analyses were conducted for these three individuals as we previously described (Wu *et al*, 2021). Briefly, whole exomes were captured and sequenced, and the obtained reads were aligned to the human genome reference assembly (hg19). For each sequenced sample, the coverage of targeted exonic regions with  $\geq 10$  reads was 98%, and the average coverage depth after removing PCR duplicates was  $> 110\times$ . After variant calling, the single-nucleotide variants and small insertions/deletions within the coding regions and splicing sites were filtered following the pipeline described in Appendix Fig S1. The variant identified after filtration was validated by Sanger sequencing. The sequences of the primers are listed in Table EV5.

### Immunofluorescence staining of human testicular sections

Human testicular tissues were fixed in formalin, embedded in paraffin, and then sectioned at 5  $\mu\text{m}$ . For immunofluorescence staining, slides were blocked with 3% nonfat milk in PBS for 30 min and then incubated with primary antibodies overnight at 4°C. After three washes in PBS containing 0.05% Triton X-100 (PBST), the slides were incubated with secondary antibodies for 1 h at 37°C. The slides were then washed three times in PBST and mounted with Vectashield medium (Vector Laboratories, H-1000). Information on the antibodies is available in Table EV6.

### Cell culture and transfection

HEK-293T cells (ATCC, CRL-3216) were cultured in high-glucose Dulbecco's modified Eagle's medium (DMEM) with 10% FBS (Gibco, 16000-044), 100 U/ml penicillin and 100 mg/ml streptomycin (Gibco, 15140-122) and maintained at 5% CO<sub>2</sub>. Cells were tested negative for mycoplasma contamination. Cells were passaged 2–3 times after thawing and transfected at 70–80% confluency. Transfection of plasmids was performed using Lipofectamine 3000 (Invitrogen L3000015) according to the manufacturer's instructions.

### RNA extraction and RT-PCR

Total RNA was extracted using TRIzol reagent (Takara, 9109), followed by the synthesis of complementary DNA (cDNA) using the PrimeScript RT reagent kit (Takara, RR047A) according to the manufacturer's instructions. EasyTaq DNA Polymerase (TransGen Biotech, AP111) was used for RT-PCR. The PCRs were performed using the following cycle conditions: 3 min at 94°C, followed by 30 cycles

of 30 s at 94°C, 30 s at 60°C, and 30 s at 72°C. The sequences of the primers are listed in Table EV5.

### Minigene splicing assay

The effect of the mutation (c.1074T > C) on the splicing of *M1AP* in humans was evaluated using the minigene splicing assay. Briefly, the *M1AP* minigene was amplified with genomic DNA from HEK-293T cells (ATCC, CRL-3216) by PCR, using primers flanking the sequences of intron 5–6 and intron 8–9 of the *M1AP* gene. Then, the PCR products were ligated with the backbone of pET01 vectors using the ClonExpress MultiS One Step Cloning Kit (Vazyme, C113) according to the manufacturer's instructions. The inserted sequences were verified by Sanger sequencing. After transfection of vectors expressing the wild-type or mutant *M1AP* minigene, HEK-293T cells were harvested for RNA extraction, followed by RT-PCR and Sanger sequencing. Sequences of primers for constructing the vectors and RT-PCR are listed in Table EV5.

### Mice

*M1ap*<sup>KI/KI</sup> mice, *M1ap*<sup>-/-</sup> mice and *Spo16*<sup>-/-</sup> mice were generated using CRISPR/Cas9 technology as we described previously (Jiang et al, 2017; Li et al, 2021). Briefly, to generate *M1ap*<sup>KI/KI</sup> mice, single-strand oligodeoxynucleotides (ssODNs) harboring a mutation equivalent to the *M1AP* splicing mutation identified in our patients were synthesized by Sangon Biotech (Shanghai). The sgRNA, Cas9 mRNAs, and ssODNs (for generating *M1ap*<sup>KI/KI</sup> mice) were microinjected into zygotes of C57BL/6 mice, followed by transfer of the microinjected zygotes into the oviducts of pseudopregnant ICR female mice. Sanger sequencing with genomic DNA extracted from mouse toes was performed to detect the mutations in the F0 generation mice. The founder mice carrying the mutation of interest were backcrossed with wild-type C57BL/6 mice for at least one generation. The obtained heterozygous mutant mice were intercrossed to produce homozygous mutant mice. All mouse studies were conducted in accordance with the guidelines approved by the Institutional Animal Care Committee of USTC. The sequences of sgRNA, ssODNs, and primers for mouse genotyping are listed in Table EV5.

### Hematoxylin and eosin staining

Mouse testicular and epididymal tissues were harvested and fixed in Bouin's solution. Human testicular tissues were fixed in formalin. After embedding in paraffin, the testicular tissue was sectioned at 5 μm. Hematoxylin and eosin (H&E) staining was performed as we described previously (Jiang et al, 2015). Mouse ovaries were harvested and fixed in modified Davidson's fluid overnight. Paraffin-embedded ovaries were serially sectioned and stained with hematoxylin for counting the numbers of follicles as we described previously (Jiao et al, 2020).

### Spermatocyte chromosome spreads and immunofluorescence staining

Spermatocyte chromosome spreads and subsequent immunofluorescence staining were performed as previously reported (Jiang et al, 2014; Ma et al, 2022). Information on the antibodies is available in Table EV6.

### Diakinesis/metaphase I chromosome spreading

Chromosome spreads of meiotic diakinesis/metaphase cells were prepared as previously described and stained with Giemsa (Jiang et al, 2017).

### Oocyte chromosome spreads

Fetal ovaries were collected from embryos at 16.5 dpc or 18.5 dpc and spread as previously described (Hwang et al, 2018; Ma et al, 2022). Briefly, ovaries were placed in hypo-extraction buffer for 15 min, transferred into 100 mM sucrose drop, and teased apart with two needles to release cells. Twenty microliters of the cell suspension was added onto slides mounted with 100 μl of 1% paraformaldehyde containing 0.15% Triton X-100, evenly spread on the slides, and then incubated in a closed humid chamber for 2 h at room temperature. The slides were then air-dried and subsequent immunofluorescence staining was performed as described above for spermatocyte spreads.

### Cell smear

Testes from adult mice and ovaries from embryos at 16.5 dpc were harvested. The tissues were placed in PBS supplemented with 10% FBS, teased apart to release cells. A drop of cell suspension was added to one side of the glass slide and spread gently using a glass capillary tube. After air-dried, the slide was fixed in 4% PFA for 10 min and permeabilized in 0.2% PBST for 30 min, followed by immunofluorescence staining as described for spermatocyte spreads.

### Coimmunoprecipitation

The mouse testes were lysed in immunoprecipitation (IP) buffer (50 mM Tris-HCl pH 7.5, 150 mM NaCl, 0.5% Triton X-100, and 2.5 mM EDTA) supplemented with 1 mM phenylmethanesulfonyl fluoride (PMSF, Thermo Fisher Scientific, 36978). The lysates were sonicated for 12 cycles (2 s on/off) with 10% pulses and centrifuged at 15,000 g at 4°C for 15 min. The supernatant was divided into two aliquots and incubated with precleared Protein A/G agarose beads (Santa Cruz, sc-2003) and 2 μg anti-M1AP C-terminal antibody (epitope: residues 415–529 of mouse protein; customizedly produced by ABclonal) or rabbit IgG antibody (ABclonal, AC005). After incubation at 4°C for 6 h, the agarose beads were washed in IP buffer five times and stored at -80°C. Western blotting using the anti-M1AP antibody, as well as silver staining, was performed to assess the quality of Co-IP. The IPed samples (including one sample obtained using anti-M1AP antibody and one sample obtained using anti-rabbit IgG antibody) were subjected to MS at the National Center for Protein Science Shanghai.

### HPLC-tandem MS (MS/MS) analysis

For protein interaction analysis, on beads digestion was performed. Briefly, beads were washed and denatured using 8 M urea with 100 mM Tris-Cl (pH 8.5), reduced by incubation with 10 mM Tris (2-Carboxyethyl)-Phosphine HCl (TCEP, Thermo Scientific, T2556), and then alkylated with 15 mM iodoacetamide (Sigma, 16125) for

30 min at room temperature in the dark. The samples were digested with Trypsin at 1:50 (w/w Promega) overnight and stopped by 5% Formic Acid (FA, Thermo Scientific, 28905). The peptide mixture was then desalted by MonoSpin™ C18 column (GL Science, 5010-21671). Desalted mixture was dried with a SpeedVac and resuspended in 0.1% FA for MS analysis.

The peptide mixture was analyzed using a homemade 30 cm-long pulled-tip analytical column (75 µm ID packed with ReproSil-Pur C18-AQ 1.9 µm resin, Dr. Maisch GmbH), and the column was then placed in-line with an Easy-nLC 1200 nano HPLC (Thermo Scientific) for MS analysis. The analytical column temperature was set at 55°C during the experiments. The mobile phase and elution gradient used for peptide separation were as follows: 0.1% formic acid in water as buffer A and 0.1% formic acid in 80% acetonitrile as buffer B, 0–1 min, 5–10% B; 1–96 min, 10–40% B; 96–104 min, 40–60% B, 104–105 min, 60–100% B, 105–120 min, 100% B. The flow rate was set as 300 nL/min.

Data-dependent MS/MS analysis was performed with a Q Exactive Orbitrap mass spectrometer (Thermo Scientific). Peptides eluted from the LC column were directly electrosprayed into the mass spectrometer with the application of a distal 2.5-kV spray voltage. A cycle of one full-scan MS spectrum ( $m/z$  300–1,800) was acquired followed by top 20 MS/MS events, sequentially generated on the first to the twentieth most intense ions selected from the full MS spectrum at a 30% normalized collision energy. Full scan resolution was set to 70,000 with automated gain control (AGC) target of 3e6. MS/MS scan resolution was set to 17,500 with isolation window of 1.8  $m/z$  and AGC target of 1e5. The number of microscans was one for both MS and MS/MS scans and the maximum ion injection time was 50 and 100 ms, respectively. The dynamic exclusion settings used were as follows: charge exclusion, 1 and > 8; exclude isotopes, on; and exclusion duration, 30 s. MS scan functions and LC solvent gradients were controlled by the Xcalibur data system (Thermo Scientific).

For protein interaction analysis, the acquired MS/MS data were analyzed against a UniProtKB *Mus musculus* (database released on Jan. 28, 2021) using Proteome Discoverer 2.4 (Thermo Scientific). Mass tolerances for precursor ions were set at 20 ppm and for fragment were set at 0.1 Da. Trypsin was defined as cleavage enzyme; cysteine alkylation by iodoacetamide was specified as fixed modification with mass shift 57.02146; methionine oxidation was set as dynamic modification with mass shift 15.9949. In order to accurately estimate peptide probabilities and false discovery rates (FDR), a decoy database containing the reversed sequences of all the proteins was appended to the target database to accurately estimate peptide probabilities and FDR, and the FDR was set at 0.01.

The list of all the peptides identified by MS in M1AP-IPed or IgG-IPed lysates are available in Dataset EV1. Proteins, identified in M1AP-IPed lysates (the number of unique peptides greater than 2) but not the IgG-IPed lysates, were considered as the candidate interacting proteins of M1AP (Table EV4).

### Co-IP in cultured cells

To construct vectors expressing MYC-tagged mouse M1AP protein and vectors expressing GFP-tagged mouse SHOC1, TEX11, or SPO16 proteins, the coding sequences of *M1ap*, *Shoc1*, *Tex11*, and *Spo16* were amplified from mouse testis cDNA by PCR and ligated with the

backbone from pEGFP-N1 vectors. The inserted sequences were verified by Sanger sequencing. Sequences of primers for constructing the vectors are listed in Table EV5.

To investigate whether M1AP interacts with the ZZS proteins directly, we cotransfected vectors expressing N-terminal MYC-tagged M1AP and vectors expressing N-terminal GFP-tagged SHOC1, TEX11, or SPO16 into HEK-293T cells. Forty-eight hours after transfection, cells were harvested for protein extraction and lysed in IP buffer supplemented with 1 mM PMSF. The obtained protein lysates were incubated with Pierce anti-c-Myc magnetic beads (Thermo Fisher Scientific, 88842) under gentle rotation at 4°C for 6 h. After washing with IP buffer five times, the beads were boiled in 1× SDS sample buffer (100 mM Tris-HCl pH 7.4, 2% SDS, 15% glycerol, 0.1% bromophenol blue and 5 mM dithiothreitol [DTT]) for 10 min, followed by Western blotting analyses.

### Statistical analysis

Data are presented as the mean ± SEM. Two-tailed Student's unpaired *t*-test was applied for all statistical analyses using the GraphPad Prism software. The difference was considered significant when the *P* value was < 0.05. The investigators were not blinded to all experiments.

## Data availability

This study includes no data deposited in public databases.

**Expanded View** for this article is available [online](#).

### Acknowledgments

We thank all the participants for their cooperation. We thank Dr. Mengcheng Luo (Wuhan University, China) for generously gifting us the anti-MLH3 antibodies and Dr. Chao Yu (Zhejiang University) for the anti-SHOC1 and the goat anti-TEX11 antibodies. We thank Dr. Jingwen Li and Dr. Chao Peng from the Mass Spectrometry System at the National Facility for Protein Science in Shanghai (NFPS), Shanghai Advanced Research Institute, Chinese Academy of Science, Shanghai 201210, China for MS sample preparation, data collection and data analysis. We also thank the Bioinformatics Center of the University of Science and Technology of China, School of Life Sciences, for providing supercomputing resources. This work was supported by the National Natural Science Foundation of China (31890780 to QS, U21A20204 to QS, 82071709 to XJ and 32061143006 to QS) and the National Key Research and Developmental Program of China (2021YFC2700200 to QS, 2021YFC2700100 to YZ, and 2019YFA0802600 to HM).

### Author contributions

**Yang Li:** Data curation; formal analysis; investigation; methodology; writing – original draft. **Yufan Wu:** Data curation; formal analysis; validation; investigation; methodology. **Ihsan Khan:** Resources; data curation; investigation; methodology. **Jianteng Zhou:** Formal analysis; methodology. **Yue Lu:** Investigation; methodology. **Jingwei Ye:** Investigation; methodology. **Junyan Liu:** Investigation; methodology. **Xuefeng Xie:** Investigation; methodology. **Congyuan Hu:** Investigation; methodology. **Hanwei Jiang:** Funding acquisition. **Suixing Fan:** Formal analysis. **Huan Zhang:** Investigation; project administration. **Yuanwei Zhang:** Funding acquisition; methodology; project administration. **Xiaohua Jiang:** Methodology; project

administration. **Bo Xu:** Methodology; project administration. **Hui Ma:** Formal analysis; supervision; funding acquisition; writing – original draft; project administration; writing – review and editing. **Qinghua Shi:** Formal analysis; supervision; funding acquisition; project administration; writing – review and editing.

### Disclosure and competing interests statement

The authors declare that they have no conflict of interest.

## References

- Adelman CA, Petrini JH (2008) ZIP4H (TEX11) deficiency in the mouse impairs meiotic double strand break repair and the regulation of crossing over. *PLoS Genet* 4: e1000042
- Agarwal S, Roeder GS (2000) Zip3 provides a link between recombination enzymes and synaptonemal complex proteins. *Cell* 102: 245–255
- Arango NA, Huang TT, Fujino A, Pieretti-Vanmarcke R, Donahoe PK (2006) Expression analysis and evolutionary conservation of the mouse germ cell-specific D6Mm5e gene. *Dev Dyn* 235: 2613–2619
- Arango NA, Li L, Dabir D, Nicolau F, Pieretti-Vanmarcke R, Koehler C, McCarrey JR, Lu N, Donahoe PK (2013) Meiosis I arrest abnormalities lead to severe oligozoospermia in meiosis I arresting protein (M1ap)-deficient mice. *Biol Reprod* 88: 76
- Arora K, Corbett KD (2019) The conserved XPF:ERCC1-like Zip2:Spo16 complex controls meiotic crossover formation through structure-specific DNA binding. *Nucleic Acids Res* 47: 2365–2376
- Baker SM, Plug AW, Prolla TA, Bronner CE, Harris AC, Yao X, Christie DM, Monell C, Arnheim N, Bradley A et al (1996) Involvement of mouse Mlh1 in DNA mismatch repair and meiotic crossing over. *Nat Genet* 13: 336–342
- Baudat F, Manova K, Yuen JP, Jasin M, Keeney S (2000) Chromosome synapsis defects and sexually dimorphic meiotic progression in mice lacking Spo11. *Mol Cell* 6: 989–998
- Baudat F, Imai Y, de Massy B (2013) Meiotic recombination in mammals: localization and regulation. *Nat Rev Genet* 14: 794–806
- Börner GV, Kleckner N, Hunter N (2004) Crossover/noncrossover differentiation, synaptonemal complex formation, and regulatory surveillance at the leptotene/zygotene transition of meiosis. *Cell* 117: 29–45
- Brown MS, Bishop DK (2014) DNA strand exchange and RecA homologs in meiosis. *Cold Spring Harb Perspect Biol* 7: a016659
- Chua PR, Roeder GS (1998) Zip2, a meiosis-specific protein required for the initiation of chromosome synapsis. *Cell* 93: 349–359
- Cole F, Kauppi L, Lange J, Roig I, Wang R, Keeney S, Jasin M (2012) Homeostatic control of recombination is implemented progressively in mouse meiosis. *Nat Cell Biol* 14: 424–430
- De Muyt A, Pyatnitskaya A, Andréani J, Ranjha L, Ramus C, Laureau R, Fernandez-Vega A, Holoch D, Girard E, Govin J et al (2018) A meiotic XPF-ERCC1-like complex recognizes joint molecule recombination intermediates to promote crossover formation. *Genes Dev* 32: 283–296
- Edelmann W, Cohen PE, Kane M, Lau K, Morrow B, Bennett S, Umar A, Kunkel T, Cattoretti G, Chaganti R et al (1996) Meiotic pachytene arrest in MLH1-deficient mice. *Cell* 85: 1125–1134
- Guiraldelli MF, Felberg A, Almeida LP, Parikh A, de Castro RO, Pezza RJ (2018) SHOC1 is a ERCC4-(HhH)2-like protein, integral to the formation of crossover recombination intermediates during mammalian meiosis. *PLoS Genet* 14: e1007381
- Handel MA, Schimenti JC (2010) Genetics of mammalian meiosis: regulation, dynamics and impact on fertility. *Nat Rev Genet* 11: 124–136
- Hollingsworth NM, Ponte L, Halsey C (1995) MSH5, a novel MutS homolog, facilitates meiotic reciprocal recombination between homologs in *Saccharomyces cerevisiae* but not mismatch repair. *Genes Dev* 9: 1728–1739
- Hua R, Liu M (2021) Sexual dimorphism in mouse meiosis. *Front Cell Dev Biol* 9: 670599
- Hunter N (2015) Meiotic recombination: the essence of heredity. *Cold Spring Harb Perspect Biol* 7: a016618
- Hwang GH, Hopkins JL, Jordan PW (2018) Chromatin spread preparations for the analysis of mouse oocyte progression from prophase to metaphase II. *J Vis Exp* 132: 56736
- Jiang H, Wang L, Cui Y, Xu Z, Guo T, Cheng D, Xu P, Yu W, Shi Q (2014) Meiotic chromosome behavior in a human male t (8; 15) carrier. *J Genet Genomics* 41: 177–185
- Jiang X, Ma T, Zhang Y, Zhang H, Yin S, Zheng W, Wang L, Wang Z, Khan M, Sheikh SW et al (2015) Specific deletion of Cdh2 in Sertoli cells leads to altered meiotic progression and subfertility of mice. *Biol Reprod* 92: 79
- Jiang L, Li T, Zhang X, Zhang B, Yu C, Li Y, Fan S, Jiang X, Khan T, Hao Q et al (2017) RPL10L is required for male meiotic division by compensating for RPL10 during meiotic sex chromosome inactivation in mice. *Curr Biol* 27: 1498–1505
- Jiao Y, Fan S, Jabeen N, Zhang H, Khan R, Murtaza G, Jiang H, Ali A, Li Y, Bao J et al (2020) A TOP6BL mutation abolishes meiotic DNA double-strand break formation and causes human infertility. *Sci Bull* 65: 2120–2129
- Kauppi L, Barchi M, Baudat F, Romanienko PJ, Keeney S, Jasin M (2011) Distinct properties of the XY pseudoautosomal region crucial for male meiosis. *Science* 331: 916–920
- Li M, Huang T, Li MJ, Zhang CX, Yu XC, Yin YY, Liu C, Wang X, Feng HW, Zhang T et al (2019) The histone modification reader ZCWPW1 is required for meiosis prophase I in male but not in female mice. *Sci Adv* 5: eaax1101
- Li Y, Wu Y, Zhou J, Zhang H, Zhang Y, Ma H, Jiang X, Shi Q (2021) A recurrent ZSWIM7 mutation causes male infertility resulting from decreased meiotic recombination. *Hum Reprod* 36: 1436–1445
- Lipkin SM, Moens PB, Wang V, Lenzi M, Shanmugarajah D, Gilgeous A, Thomas J, Cheng J, Touchman JW, Green ED et al (2002) Meiotic arrest and aneuploidy in MLH3-deficient mice. *Nat Genet* 31: 385–390
- Liu H, Huang T, Li M, Li M, Zhang C, Jiang J, Yu X, Yin Y, Zhang F, Lu G et al (2019) SCRE serves as a unique synaptonemal complex fastener and is essential for progression of meiosis prophase I in mice. *Nucleic Acids Res* 47: 5670–5683
- Ma H, Li T, Xie X, Jiang L, Ye J, Gong C, Jiang H, Fan S, Zhang H, Shi B et al (2022) RAD51AP2 is required for efficient meiotic recombination between X and Y chromosomes. *Sci Adv* 8: eabk1789
- Macaisne N, Novatchkova M, Peirera L, Vezon D, Jolivet S, Froger N, Chelysheva L, Grelon M, Mercier R (2008) SHOC1, an XPF endonuclease-related protein, is essential for the formation of class I meiotic crossovers. *Curr Biol* 18: 1432–1437
- Nakagawa T, Ogawa H (1999) The *Saccharomyces cerevisiae* MER3 gene, encoding a novel helicase-like protein, is required for crossover control in meiosis. *EMBO J* 18: 5714–5723
- Nishant KT, Plys AJ, Alani E (2008) A mutation in the putative MLH3 endonuclease domain confers a defect in both mismatch repair and meiosis in *Saccharomyces cerevisiae*. *Genetics* 179: 747–755
- Novak JE, Ross-Macdonald PB, Roeder GS (2001) The budding yeast Msh4 protein functions in chromosome synapsis and the regulation of crossover distribution. *Genetics* 158: 1013–1025
- Pittman DL, Cobb J, Schimenti KJ, Wilson LA, Cooper DM, Brignull E, Handel MA, Schimenti JC (1998) Meiotic prophase arrest with failure of



- chromosome synapsis in mice deficient for Dmc1, a germline-specific RecA homolog. *Mol Cell* 1: 697–705
- Pyatnitskaya A, Borde V, De Muyt A (2019) Crossing and zipping: molecular duties of the ZMM proteins in meiosis. *Chromosoma* 128: 181–198
- Reynolds A, Qiao H, Yang Y, Chen JK, Jackson N, Biswas K, Holloway JK, Baudat F, de Massy B, Wang J et al (2013) RNF212 is a dosage-sensitive regulator of crossing-over during mammalian meiosis. *Nat Genet* 45: 269–278
- Robert T, Nore A, Brun C, Maffre C, Crimi B, Bourbon HM, de Massy B (2016) The TopoVIB-like protein family is required for meiotic DNA double-strand break formation. *Science* 351: 943–949
- Romanienko PJ, Camerini-Otero RD (2000) The mouse Spo11 gene is required for meiotic chromosome synapsis. *Mol Cell* 6: 975–987
- Shinohara M, Oh SD, Hunter N, Shinohara A (2008) Crossover assurance and crossover interference are distinctly regulated by the ZMM proteins during yeast meiosis. *Nat Genet* 40: 299–309
- Snowden T, Acharya S, Butz C, Berardini M, Fishel R (2004) hMSH4-hMSH5 recognizes Holliday junctions and forms a meiosis-specific sliding clamp that embraces homologous chromosomes. *Mol Cell* 15: 437–451
- Sym M, Engebrecht JA, Roeder GS (1993) ZIP1 is a synaptonemal complex protein required for meiotic chromosome synapsis. *Cell* 72: 365–378
- Tsubouchi T, Zhao H, Roeder GS (2006) The meiosis-specific zip4 protein regulates crossover distribution by promoting synaptonemal complex formation together with zip2. *Dev Cell* 10: 809–819
- Tu C, Wang Y, Nie H, Meng L, Wang W, Li Y, Li D, Zhang H, Lu G, Lin G et al (2020) An M1AP homozygous splice-site mutation associated with severe oligozoospermia in a consanguineous family. *Clin Genet* 97: 741–746
- Vrielynck N, Chambon A, Vezon D, Pereira L, Chelysheva L, De Muyt A, Mézard C, Mayer C, Grelon M (2016) A DNA topoisomerase VI-like complex initiates meiotic recombination. *Science* 351: 939–943
- Wang TF, Kleckner N, Hunter N (1999) Functional specificity of MutL homologs in yeast: Evidence for three Mlh1-based heterocomplexes with distinct roles during meiosis in recombination and mismatch correction. *Proc Natl Acad Sci U S A* 96: 13914–13919
- Wang S, Zickler D, Kleckner N, Zhang L (2015) Meiotic crossover patterns: obligatory crossover, interference and homeostasis in a single process. *Cell Cycle* 14: 305–314
- Wang JJ, Ge W, Zhai QY, Liu JC, Sun XW, Liu WX, Li L, Lei CZ, Dyce PW, De Felici M et al (2020) Single-cell transcriptome landscape of ovarian cells during primordial follicle assembly in mice. *PLoS Biol* 18: e3001025
- WHO (2010) *WHO laboratory manual for the examination and processing of human semen*, 5th edn. Geneva: WHO Press
- Wu Y, Li Y, Murtaza G, Zhou J, Jiao Y, Gong C, Hu C, Han Q, Zhang H, Zhang Y et al (2021) Whole-exome sequencing of consanguineous families with infertile men and women identifies homologous mutations in SPATA22 and MEIOB. *Hum Reprod* 36: 2793–2804
- Wyrwoll MJ, Temel ŞG, Nagirnaja L, Oud MS, Lopes AM, van der Heijden GW, Heald JS, Rotte N, Wistuba J, Wöste M et al (2020) Bi-allelic mutations in M1AP are a frequent cause of meiotic arrest and severely impaired spermatogenesis leading to male infertility. *Am J Hum Genet* 107: 342–351
- Yang F, Eckardt S, Leu NA, McLaughlin KJ, Wang PJ (2008a) Mouse TEX15 is essential for DNA double-strand break repair and chromosomal synapsis during male meiosis. *J Cell Biol* 180: 673–679
- Yang F, Gell K, van der Heijden GW, Eckardt S, Leu NA, Page DC, Benavente R, Her C, Höög C, McLaughlin KJ et al (2008b) Meiotic failure in male mice lacking an X-linked factor. *Genes Dev* 22: 682–691
- Zakharyevich K, Tang S, Ma Y, Hunter N (2012) Delineation of joint molecule resolution pathways in meiosis identifies a crossover-specific resolvase. *Cell* 149: 334–347
- Zhang Q, Shao J, Fan HY, Yu C (2018) Evolutionarily-conserved MZIP2 is essential for crossover formation in mammalian meiosis. *Commun Biol* 1: 147
- Zhang J, Fujiwara Y, Yamamoto S, Shibuya H (2019a) A meiosis-specific BRCA2 binding protein recruits recombinases to DNA double-strand breaks to ensure homologous recombination. *Nat Commun* 10: 722
- Zhang Q, Ji SY, Busayavalasa K, Yu C (2019b) SPO16 binds SHOC1 to promote homologous recombination and crossing-over in meiotic prophase I. *Sci Adv* 5: eaau9780
- Zickler D, Kleckner N (2015) Recombination, pairing, and synapsis of homologs during meiosis. *Cold Spring Harb Perspect Biol* 7: a016626

## Expanded View Figures

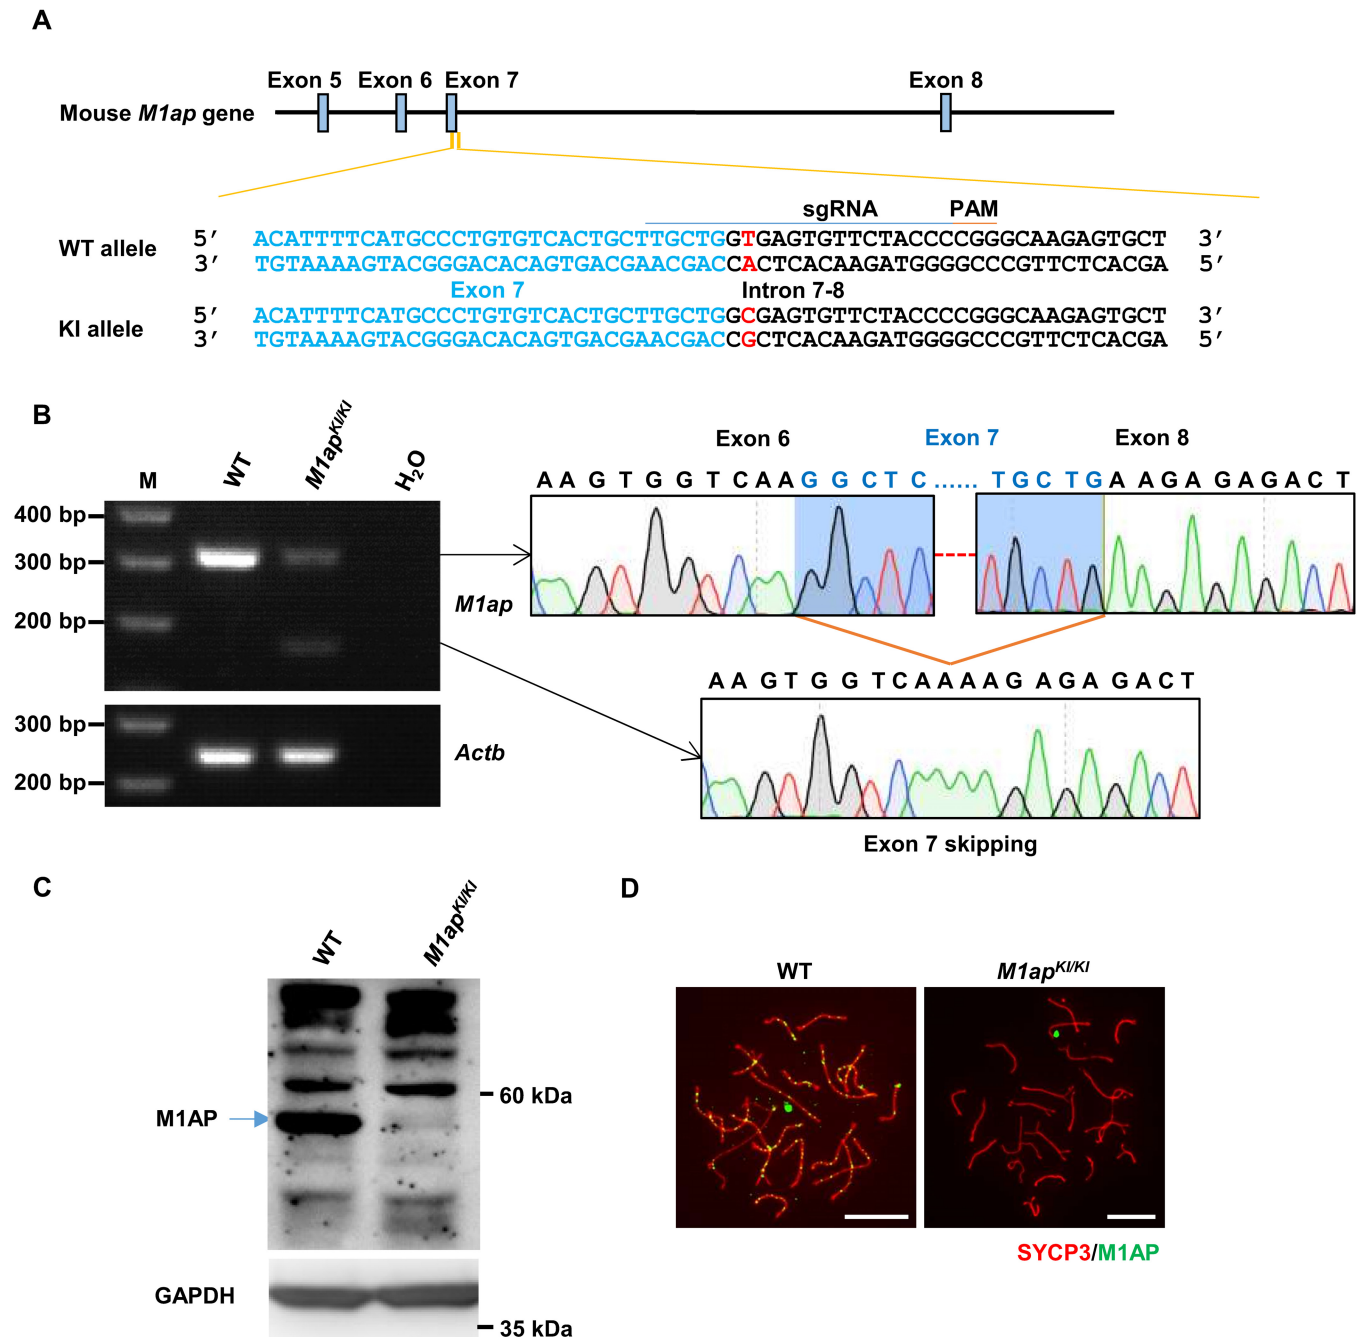

**Figure EV1. Generation of *M1ap*<sup>KI/KI</sup> mice.**

- A The strategy to generate mice that carry an *M1ap* knockin (KI) mutation equivalent to that of our patients. The single guide RNA (sgRNA, underlined) was designed to target the splicing mutation site (written in red). In the KI allele, thymine was replaced by cytosine. Nucleotides from exon 7 are written in blue. WT, wild-type. PAM, protospacer adjacent motif.
- B Reverse transcription-PCR analysis of WT and homozygous *M1ap*<sup>KI/KI</sup> mouse testes with primers spanning exons 6–8. *Actb* served as an internal control.
- C Western blotting with testis lysates from WT and homozygous *M1ap*<sup>KI/KI</sup> mice using the anti-M1AP antibody. GAPDH was used as the loading control. The band corresponding to WT full-length M1AP protein is indicated by an arrow.
- D Immunofluorescence staining of M1AP (green) and SYCP3 (red) on the spermatocyte spreads of WT and *M1ap*<sup>KI/KI</sup> mice. Scale bars, 10  $\mu$ m.

**Figure EV2. The phenotype of *Mlap<sup>Kl/Kl</sup>* mice.**

- A Representative images of testes from 8-week-old control and *Mlap<sup>Kl/Kl</sup>* mice. Each grid represents 1 mm.
- B The ratio of testis/body weight of 8-week-old control and *Mlap<sup>Kl/Kl</sup>* mice.
- C The sperm count per epididymis of 8-week-old control and *Mlap<sup>Kl/Kl</sup>* mice.
- D Representative images of hematoxylin and eosin-stained sections of cauda epididymides from 8-week-old wild-type and *Mlap<sup>Kl/Kl</sup>* mice. Scale bars, 50  $\mu$ m.
- E Immunofluorescence staining of SYCP3 (red) and MLH3 (green) in spermatocyte spreads from 8-week-old control and *Mlap<sup>Kl/Kl</sup>* mice. Scale bars, 10  $\mu$ m.
- F Number of MLH3 foci per cell in control and *Mlap<sup>Kl/Kl</sup>* spermatocytes.
- G Immunofluorescence staining of SYCP3 (red) and  $\gamma$ H2AX (green) on spermatocyte spreads from 8-week-old control and *Mlap<sup>Kl/Kl</sup>* mice. Scale bars, 10  $\mu$ m.
- H The percentages of spermatocytes at each stage of meiotic prophase I in 8-week-old control and *Mlap<sup>Kl/Kl</sup>* mice.

Data information: (B and C), Data are shown as the mean  $\pm$  SEM of three biological replicates. (F and H) Data are shown as the mean  $\pm$  SEM. *n* shows the number of cells scored from three biological replicates. \*\**P* < 0.01; \*\*\**P* < 0.001; \*\*\*\**P* < 0.0001; NS, not significant; two-tailed Student's *t*-test.

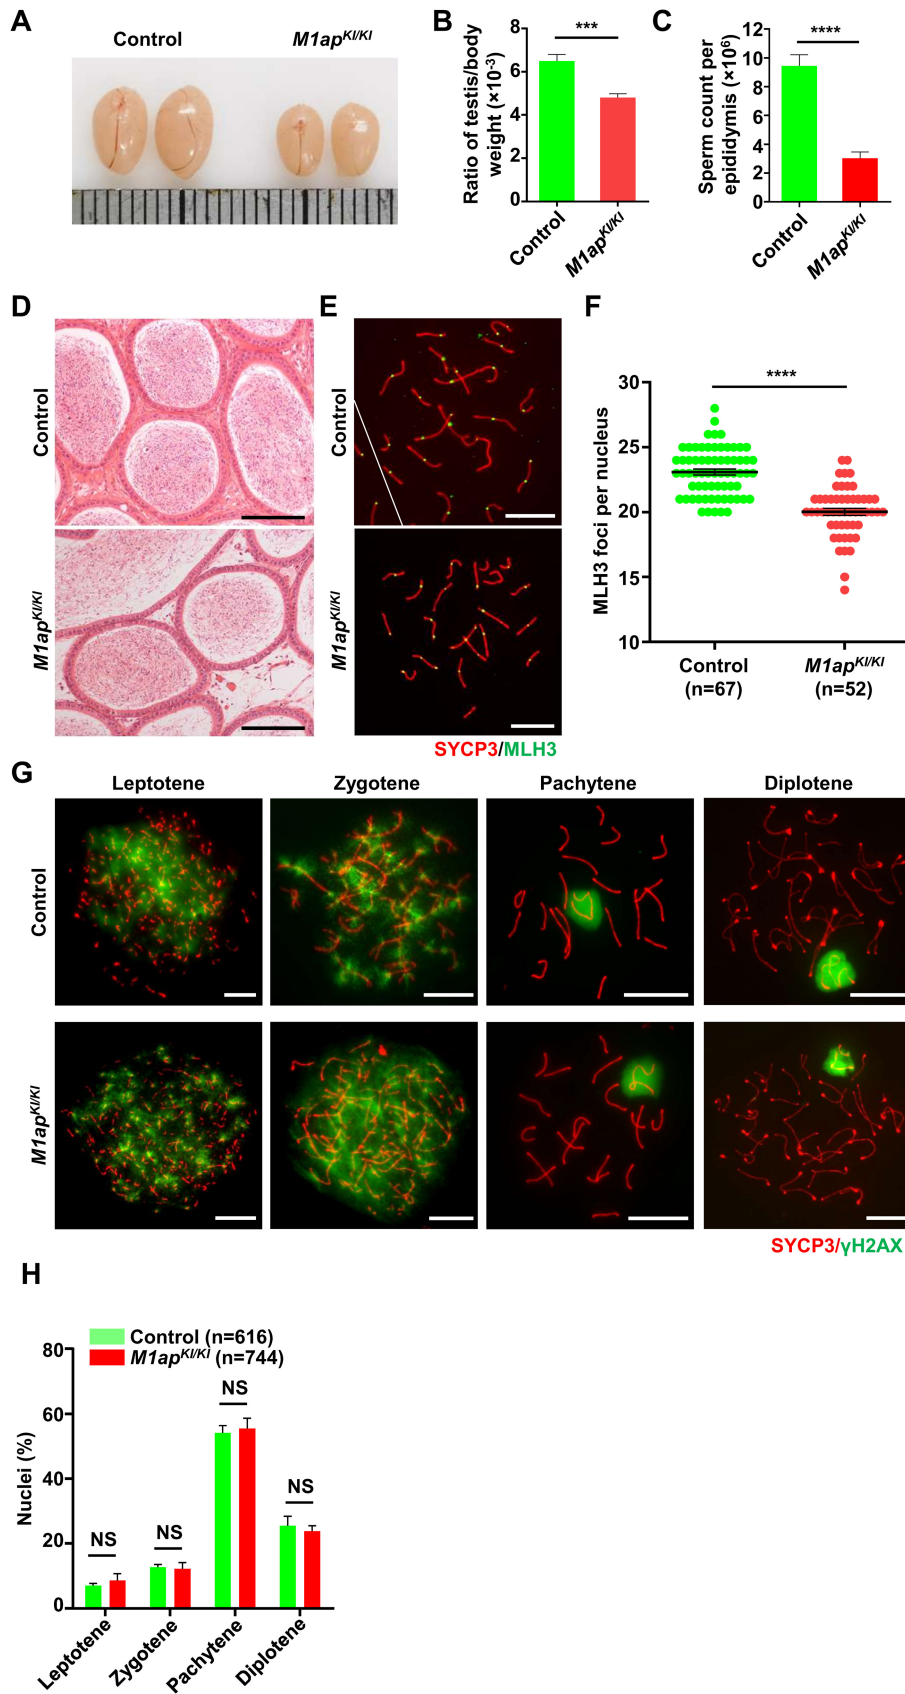

Figure EV2.

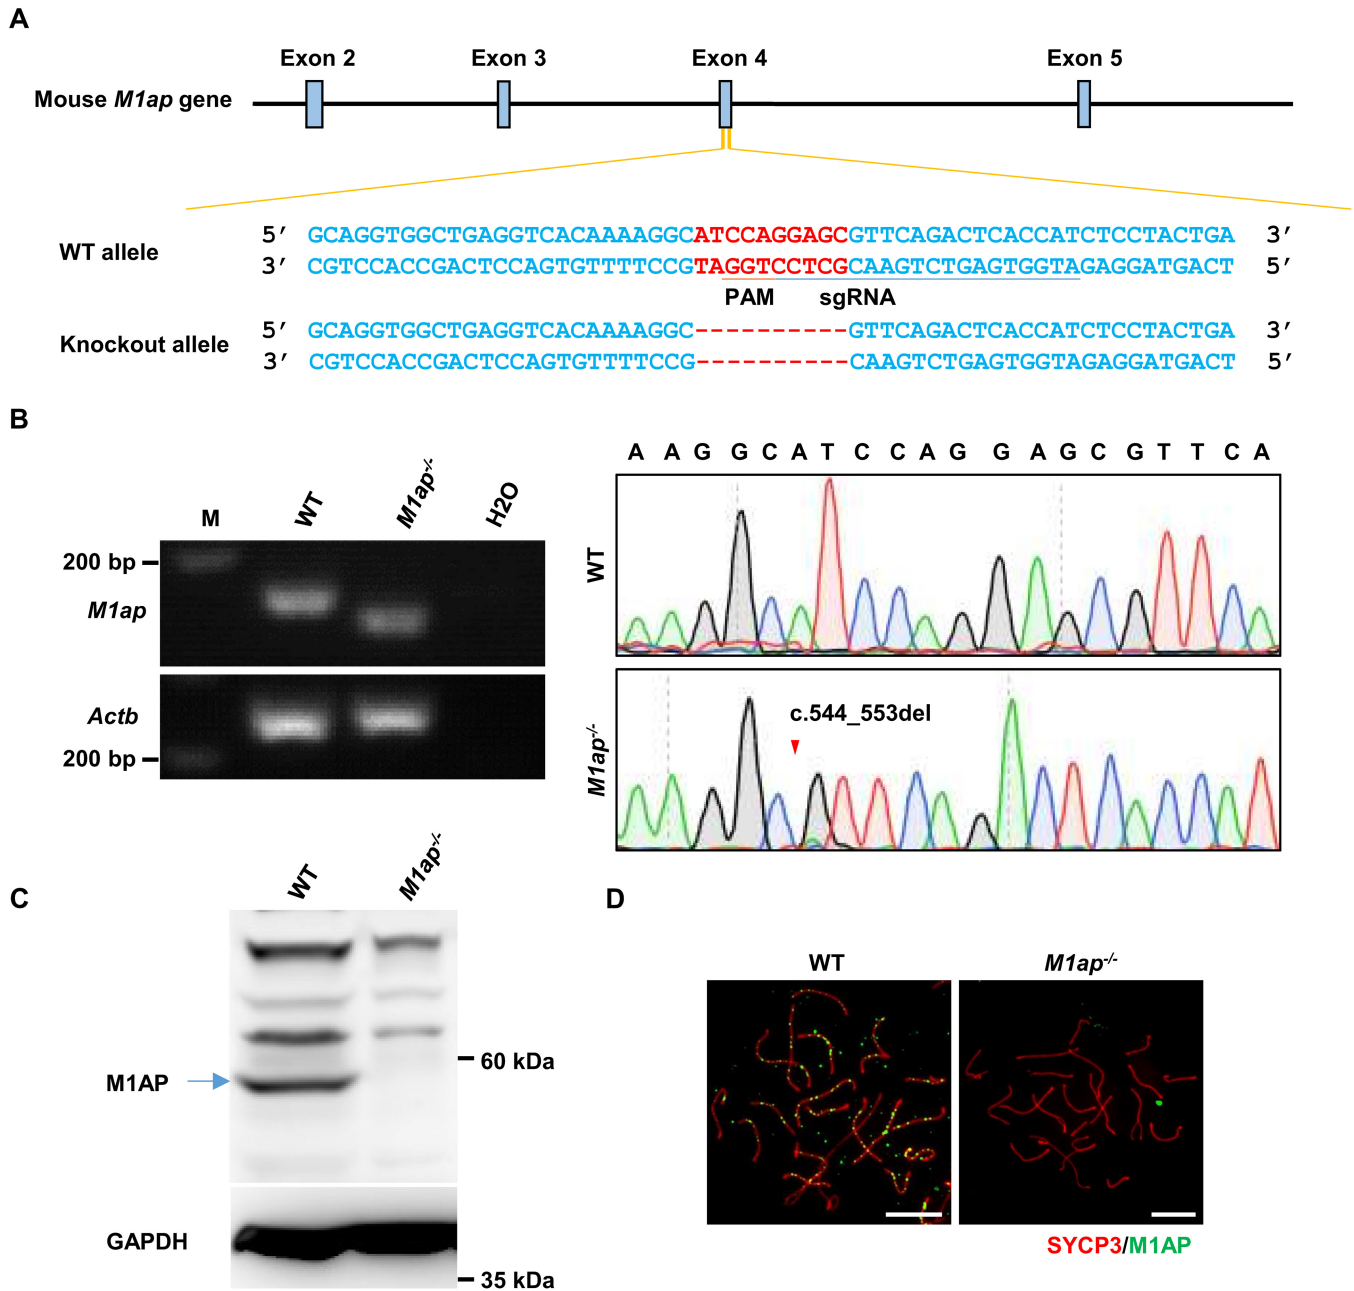

**Figure EV3. Generation of *M1ap*<sup>-/-</sup> mice.**

- A The strategy to generate *M1ap*<sup>-/-</sup> mice. The single guide RNA (underlined) was designed to target exon 4 of the *M1ap* gene. A 10-base pair deletion was detected in the *M1ap* knockout allele. WT, wild-type. PAM, protospacer adjacent motif.
- B Gel electrophoresis of the PCR products obtained from testis cDNA and subsequent Sanger sequencing showing the 10-base pair deletion in the *M1ap*<sup>-/-</sup> mice. *Actb* served as an internal control. The arrowhead indicates the mutation site.
- C Western blotting with testis lysates from WT and *M1ap*<sup>-/-</sup> mice using the anti-M1AP antibody. GAPDH was used as the loading control. The band corresponding to full-length WT M1AP protein is indicated by an arrow.
- D Immunofluorescence staining of M1AP (green) and SYCP3 (red) on the spermatocyte spreads of WT and *M1ap*<sup>-/-</sup> mice. Scale bars, 10  $\mu$ m.

**Figure EV4. The phenotype of *M1ap*<sup>-/-</sup> mice.**

- A–C Representative images of testes (A), the ratio of testis/body weight (B), and the sperm count per epididymis (C) from 8-week-old control and *M1ap*<sup>-/-</sup> mice. Each grid represents 1 mm in (A).
- D Representative images of hematoxylin and eosin-stained sections of testes and cauda epididymides from 8-week-old control and *M1ap*<sup>-/-</sup> mice. A magnified view of the boxed representative metaphase cell is shown in the lower left corner of the image of *M1ap*<sup>-/-</sup> mice. The blue arrow indicates unaligned chromosomes. Scale bars, 50 μm.
- E Immunofluorescence staining of SYCP3 (red) and γH2AX (green) on spermatocyte spreads from 8-week-old control and *M1ap*<sup>-/-</sup> mice. Scale bars, 10 μm.
- F The percentages of spermatocytes at each stage of meiotic prophase I in 8-week-old control and *M1ap*<sup>-/-</sup> mice.
- G Quantification of nuclei with untouching XY chromosomes at pachytene.
- H Immunofluorescence staining of SYCP3 (red) and MLH3 (green) in spermatocyte spreads from 8-week-old control and *M1ap*<sup>-/-</sup> mice. Scale bars, 10 μm.
- I Number of MLH3 foci per cell.
- J Meiotic metaphase I (MMI) spermatocytes stained with Giemsa. Scale bars, 10 μm.
- K Number of bivalents per nucleus.
- L Frequencies of nuclei with univalents.
- M Frequencies of nuclei with only XY univalents, only autosome univalents, or both XY and autosome univalents.

Data information: (B and C), Data are presented as the mean ± SEM of three biological replicates. (F, G, I, and K–M) Data are presented as mean ± SEM. *n* shows the number of cells scored from at least three biological replicates. \*\**P* < 0.01; \*\*\**P* < 0.001; \*\*\*\**P* < 0.0001; NS, not significant; two-tailed Student's *t*-test.

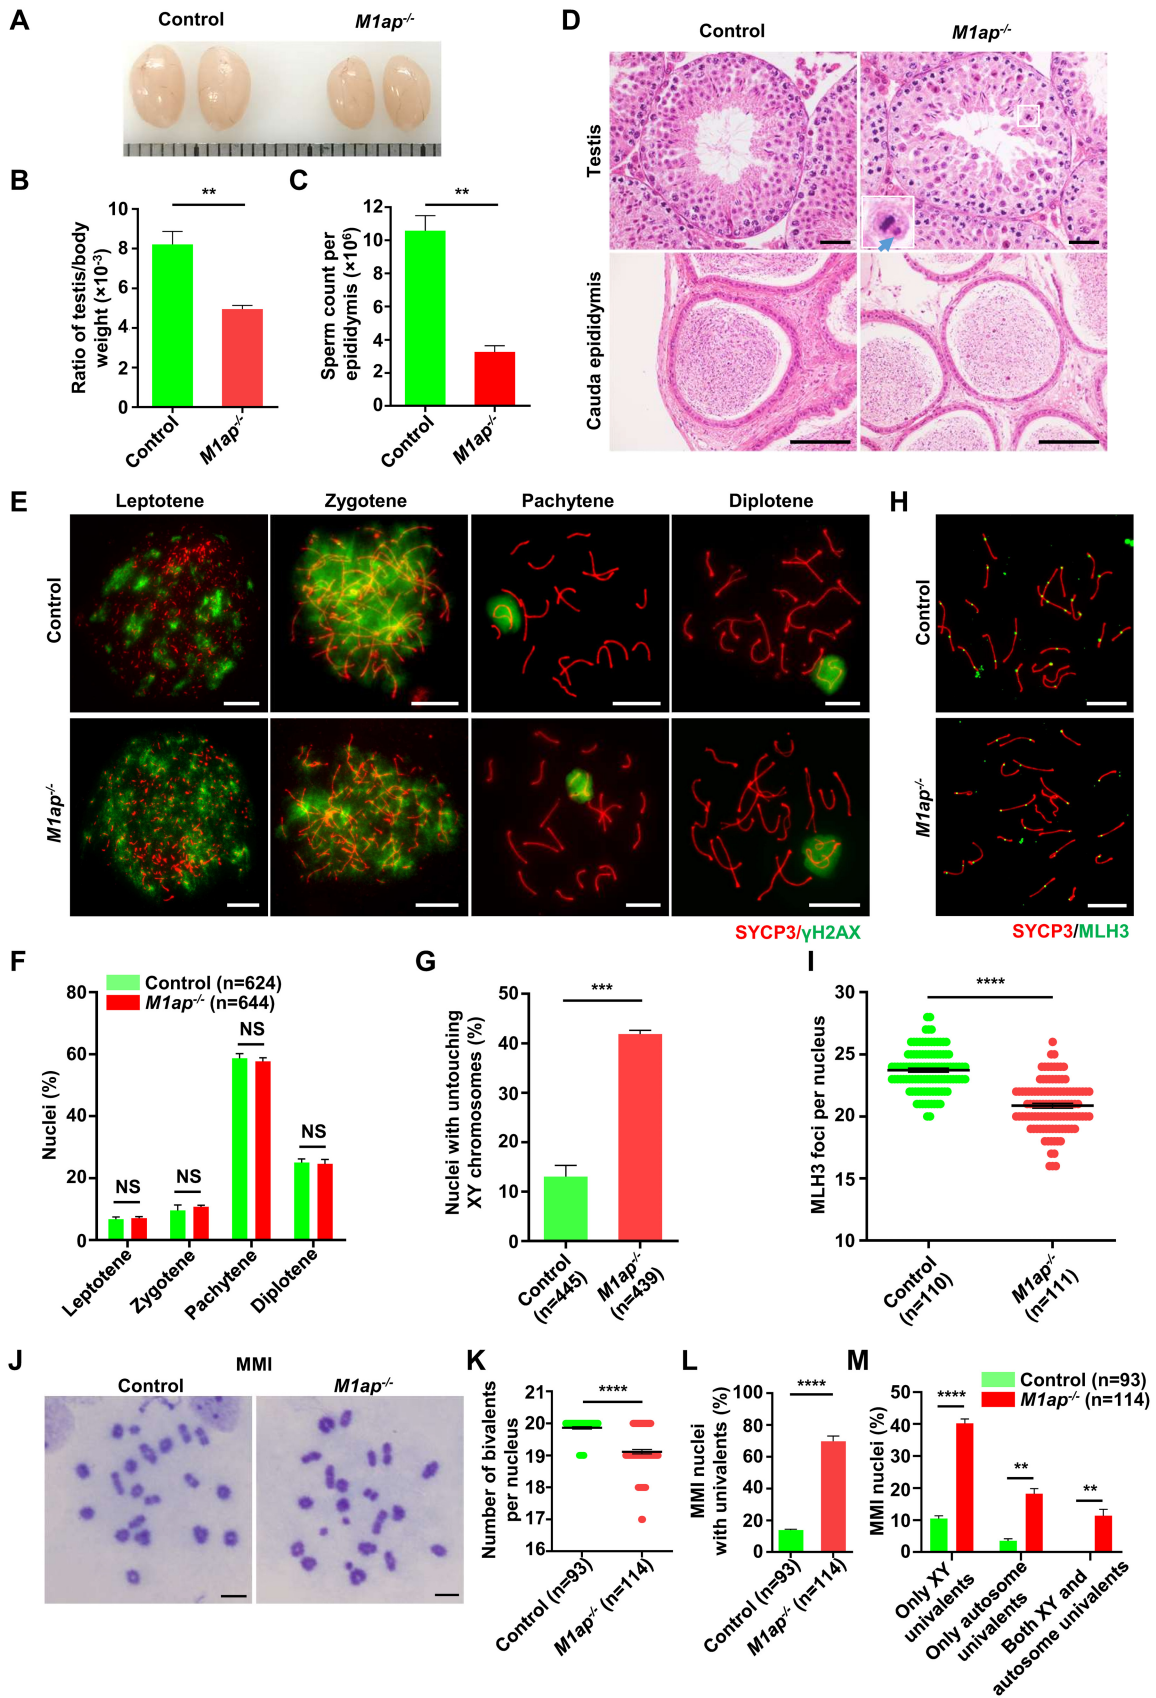

Figure EV4.

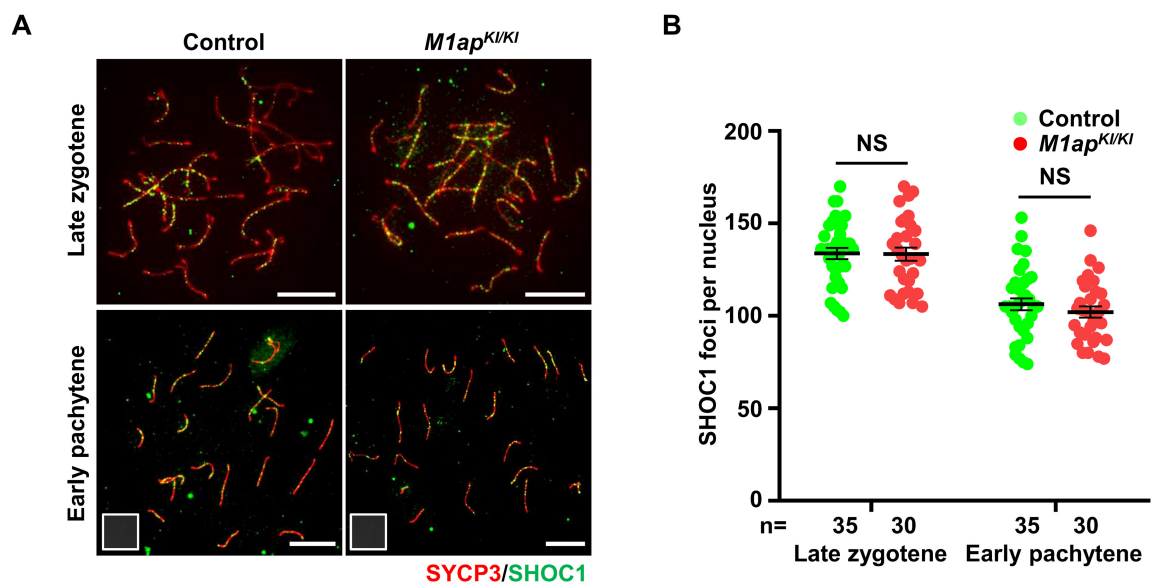

**Figure EV5.** No obvious differences were observed in the number of SHOC1 foci between control and *M1ap<sup>KI/KI</sup>* spermatocytes.

A Immunofluorescence staining with antibodies against SYCP3 (red) and SHOC1 (green) on spermatocyte spreads. Scale bars, 10  $\mu$ m.

B The mean number of SHOC1 foci per cell in control and *M1ap<sup>KI/KI</sup>* spermatocytes at the indicated stages. Data are presented as the mean  $\pm$  SEM. *n* shows the number of cells scored from three biological replicates. NS, not significant; two-tailed Student's *t*-test.



## Appendix

### **M1AP interacts with the mammalian ZZS complex and promotes male meiotic recombination**

Yang Li<sup>1\*</sup>, Yufan Wu<sup>1\*</sup>, Ihsan Khan<sup>1\*</sup>, Jianteng Zhou<sup>1</sup>, Yue Lu<sup>1</sup>, Jingwei Ye<sup>1</sup>,  
Junyan Liu<sup>1</sup>, Xuefeng Xie<sup>1</sup>, Congyuan Hu<sup>1</sup>, Hanwei Jiang<sup>1</sup>, Suixing Fan<sup>1</sup>,  
Huan Zhang<sup>1</sup>, Yuanwei Zhang<sup>1</sup>, Xiaohua Jiang<sup>1</sup>, Bo Xu<sup>1</sup>, Hui Ma<sup>1#</sup>, Qinghua  
Shi<sup>1#</sup>

### **Table of content**

|                          |       |
|--------------------------|-------|
| Appendix Figure S1 ..... | page2 |
| Appendix Figure S2 ..... | page3 |
| Appendix Figure S3 ..... | page4 |

# Appendix Figure S1

A

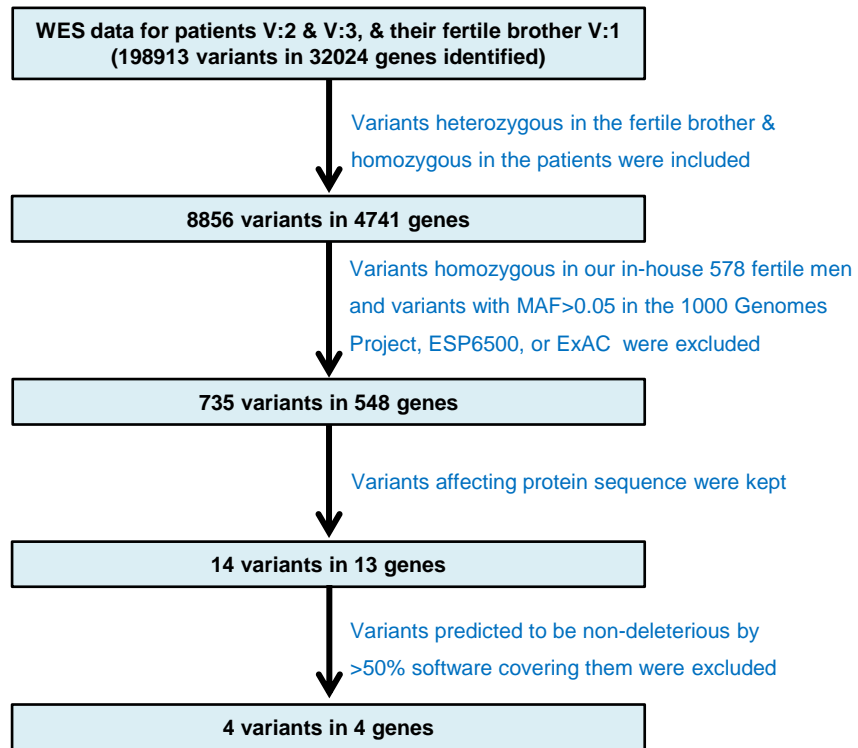

B

| Human gene symbol | Mouse gene symbol | Mutation type              | cDNA change           | Predicted protein change | Remark                                                                                                   |
|-------------------|-------------------|----------------------------|-----------------------|--------------------------|----------------------------------------------------------------------------------------------------------|
| <i>MIAP</i>       | <i>Mlap</i>       | splicing                   | 1074+2T>C             | Not applicable           | Mice homozygous for a hypomorphic allele exhibit severe oligozoospermia and infertility (PMID:23269666). |
| <i>MCEE</i>       | <i>Mcee</i>       | missense                   | G428A                 | R143H                    | No mention of reproductive phenotype after knockout of this gene in MGI (MGI:1920974).                   |
| <i>DYSF</i>       | <i>Dysf</i>       | nonframeshift substitution | 3181delinsC<br>AGGCGG | 1062insAE                | No mention of reproductive phenotype after knockout of this gene in MGI (MGI:1349385).                   |
| <i>AHCTF1P1</i>   | -                 | missense                   | G1381A                | E461K                    | This gene is a pseudogene.                                                                               |

## Appendix Figure S1. Whole-exome sequencing data analysis for the consanguineous Pakistani family

A. Whole-exome sequencing (WES) data analysis pipeline. MAF, minor allele frequency.

B. Information on the variants identified following bioinformatic analysis of WES data. MGI, mouse genome informatics.

## Appendix Figure S2

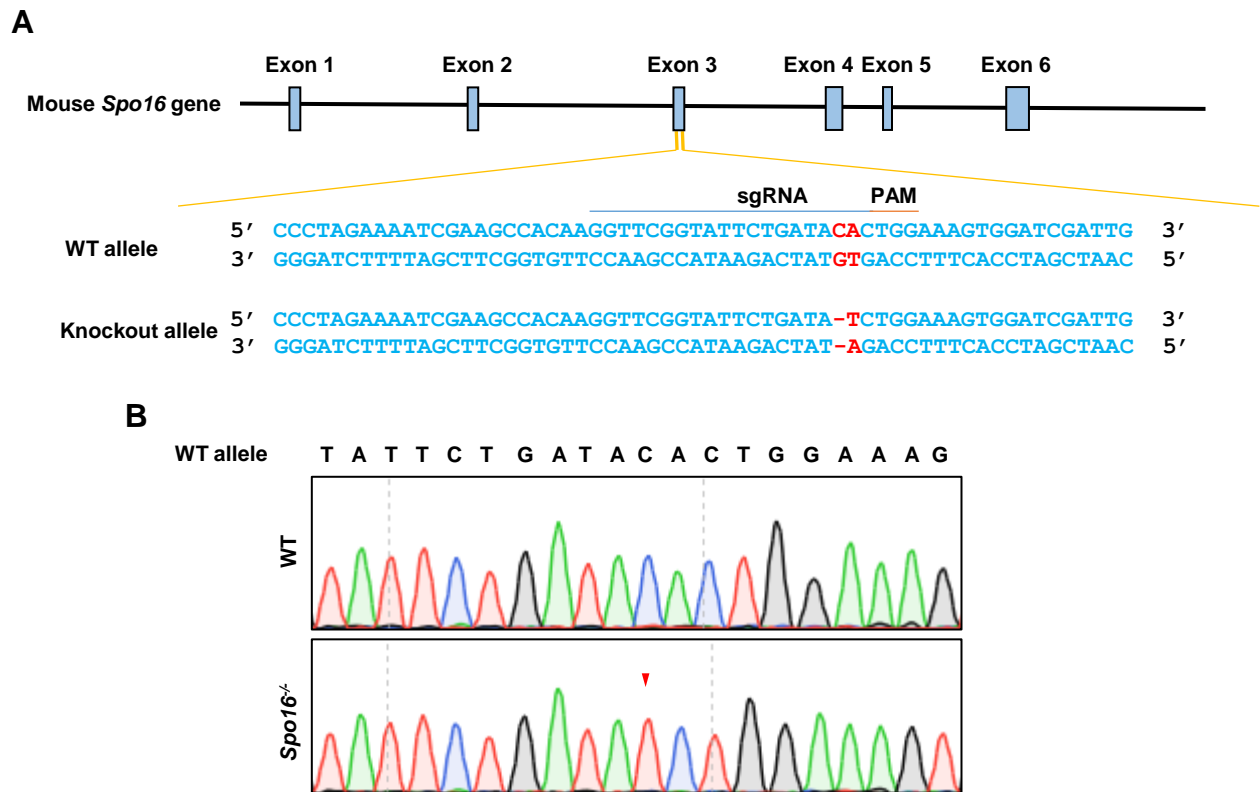

### Appendix Figure S2. Generation of *Spo16*<sup>-/-</sup> mice

- A. The strategy to generate *Spo16*<sup>-/-</sup> mice. The single guide RNA (underlined) was designed to target exon 3 of the *Spo16* gene. The mutation site is written in red, where “CA” is replaced by “T”. WT, wild-type. PAM, protospacer adjacent motif.
- B. Sanger sequencing confirmed the mutation in the *Spo16*<sup>-/-</sup> mice at the genomic DNA level. The arrowhead indicates the mutation site.

## Appendix Figure S3

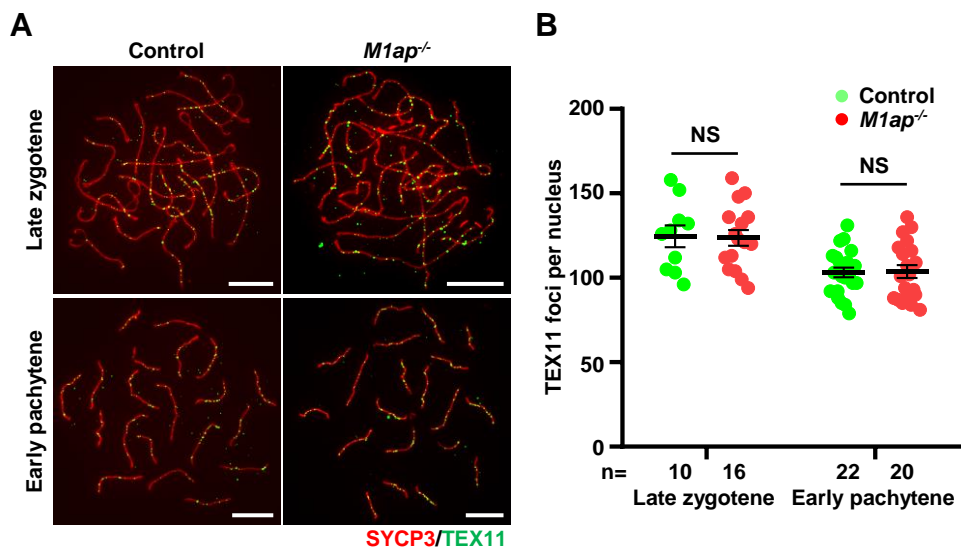

**Appendix Figure S3. No obvious differences were observed in the number of TEX11 foci between control and *M1ap*<sup>-/-</sup> oocytes**

A. Immunofluorescence staining with antibodies against SYCP3 (red) and TEX11 (green) on oocyte spreads from 16.5 days postcoitus (dpc) control and *M1ap*<sup>-/-</sup> fetal mice. Scale bars, 10  $\mu\text{m}$ .

B. The mean number of TEX11 foci per cell in control and *M1ap*<sup>-/-</sup> oocytes at the indicated stages. Data are presented as mean  $\pm$  SEM. n shows the number of cells examined for at least two mice per genotype. NS, not significant; two-tailed Student's *t*-test.
